# Supplementary material for: 2D conductive metal–organic frameworks for NO electrochemical reduction: a first-principles study
Source: Royal Society of Chemistry journal article supplement (doi:10.1039/d4ta04795h), 2024-01-01
Supplement: d4ta04795h1.pdf [file d4ta04795h1.pdf]

## Supporting Information

### **2D Conductive Metal-Organic Frameworks for NO Electrochemical**

### **Reduction: A First-Principles Study**

*Xing Chen, <sup>a#</sup> Xiangyu Zhu, <sup>a#</sup> Zhiyuan Xia, <sup>a</sup> Shiting Qian, <sup>a</sup> Yanan Zhou <sup>b\*</sup> Qiquan Luo<sup>a\*</sup> and Jinlong Yang<sup>c\*</sup>*

*<sup>a</sup>Institutes of Physical Science and Information Technology, Anhui University, Hefei 230601, China.*

*<sup>b</sup>School of Material Science and Chemical Engineering, Institute of Mass Spectrometry, Ningbo University, Fenghua Road 818, Ningbo 315211, China.*

*<sup>c</sup>Key Laboratory of Precision and Intelligent Chemistry, Department of Chemical Physics, Hefei National Research Center for Physical Sciences at the Microscale, University of Science and Technology of China, Hefei, Anhui 230026, China.*

#X.C and X.Z contributed equally to this work

\*Email: [qluo@ustc.edu.cn](mailto:qluo@ustc.edu.cn); [zhouyanan@nbu.edu.cn](mailto:zhouyanan@nbu.edu.cn); [jlyang@ustc.edu.cn](mailto:jlyang@ustc.edu.cn).

## *Table of content*

|                                                                                                                                                                                                                   |     |
|-------------------------------------------------------------------------------------------------------------------------------------------------------------------------------------------------------------------|-----|
| <b>Constant potential method</b> .....                                                                                                                                                                            | S1  |
| <b>The model details for Pt(100)</b> .....                                                                                                                                                                        | S3  |
| <b>Nitric oxide reduction five-electron mechanism</b> .....                                                                                                                                                       | S4  |
| <b>Detailed descriptions and computational details of SISSO method</b> .....                                                                                                                                      | S5  |
| <b>One-dimensional descriptors of TMX<sub>4</sub>-HTPs</b> .....                                                                                                                                                  | S6  |
| <b>Fig. S1</b> Top view of TMX <sub>4</sub> -HTP monolayer.....                                                                                                                                                   | S7  |
| <b>Fig. S2</b> Three possible adsorption patterns of NO on TMX <sub>4</sub> -HTPs.....                                                                                                                            | S8  |
| <b>Fig. S3</b> The energy profile of the protonation processes for Pt(100) .....                                                                                                                                  | S9  |
| <b>Fig. S4</b> Energy( $\Delta G_1$ ) required for the first protonation step .....                                                                                                                               | S10 |
| <b>Fig. S5</b> Schematic pathways of the NORR process toward NH <sub>3</sub> synthesis.....                                                                                                                       | S11 |
| <b>Fig. S6</b> Free energy diagrams of electrochemical NO-to-NH <sub>3</sub> .....                                                                                                                                | S12 |
| <b>Fig. S7</b> Energy profile for AIMD simulation .....                                                                                                                                                           | S13 |
| <b>Fig. S8</b> The molecular orbital diagram of NO.....                                                                                                                                                           | S14 |
| <b>Fig. S9</b> PDOS of (a)TMN <sub>4</sub> -HTPs, (b)TMO <sub>4</sub> -HTPs, (c) TMP <sub>4</sub> -HTPs, and (d)TMS <sub>4</sub> -HTPs.....                                                                       | S15 |
| <b>Fig. S10</b> PDOS of NO-adsorbed (a)TMN <sub>4</sub> -HTPs, (b)TMO <sub>4</sub> -HTPs, (c) TMP <sub>4</sub> -HTPs, and (d)TMS <sub>4</sub> -HTPs .....                                                         | S16 |
| <b>Fig. S11</b> Scaling relationship among free energies of NO, transfer charge of TM atoms, and the N-O bond of adsorbed NO on TMX <sub>4</sub> -HTPs .....                                                      | S17 |
| <b>Fig. S12</b> Adsorption free energies of HNO ( $\Delta G^*_{\text{HNO}}$ ), NOH ( $\Delta G^*_{\text{NOH}}$ ).....                                                                                             | S18 |
| <b>Fig. S13</b> PDOS of MnO <sub>4</sub> -HTP adsorbed with HNO and NOH.....                                                                                                                                      | S19 |
| <b>Fig. S14</b> The PDOS of MnO-HTP by HSE06 hybrid functional .....                                                                                                                                              | S20 |
| <b>Fig. S15</b> Free energy diagrams of electrochemical NO-to-NH <sub>3</sub> conversion on MnO <sub>4</sub> -HTP by PBE+SOL+U .....                                                                              | S21 |
| <b>Fig. S16</b> Simulated polarization curve of MnO <sub>4</sub> -HTP and Pt (100).....                                                                                                                           | S22 |
| <b>Fig. S17</b> Total energies of intermediates as a function of applied potential U .....                                                                                                                        | S23 |
| <b>Fig. S18</b> The free energy curves of MnO <sub>4</sub> -HTP under varying electrode potentials at (a) pH=1, and (b) pH=13. ....                                                                               | S24 |
| <b>Fig. S19</b> pH-dependent and potential-dependent contour plot of the reaction energy for the second protonation step. ....                                                                                    | S25 |
| <b>Fig. S20</b> The DFT-calculated $\Delta G^*_{\text{H}}$ , $\Delta G^*_{\text{H}_2\text{O}}$ and $\Delta G^*_{\text{NH}_3}$ values of TMX <sub>4</sub> -HTP were compared with the SISSO predicted values. .... | S26 |
| <b>Fig. S21</b> Comparison of DFT-calculated $\Delta G^*_{\text{H}}$ , $\Delta G^*_{\text{H}_2\text{O}}$ and $\Delta G^*_{\text{NH}_3}$ values with the SISSO-predicted values. ....                              | S27 |
| <b>Fig. S21</b> The structure of Fe-N-C .....                                                                                                                                                                     | S28 |
| <b>Fig. S23</b> Free energy diagrams of CoO <sub>4</sub> -HTP, CuO <sub>4</sub> -HTP, and Co <sub>0.5</sub> Cu <sub>0.5</sub> O <sub>4</sub> -HTP .....                                                           | S29 |
| <b>Tab. S1</b> Calculated energies of MnO <sub>4</sub> -HTP at different vacuum spaces .....                                                                                                                      | S30 |
| <b>Tab. S2</b> TMX <sub>4</sub> -HTP energy and lattice length a, b.....                                                                                                                                          | S31 |
| <b>Tab. S3</b> Computed the $\mu_{\text{TM}}$ , $E_{\text{f}}$ , $U^{\circ}_{\text{diss}}$ , $N_{\text{e}}$ , $U_{\text{diss}}$ .....                                                                             | S32 |
| <b>Tab. S4</b> Free energies of NO on TMX <sub>4</sub> -HTPs with N-end, O-end, and side-on patterns.....                                                                                                         | S33 |
| <b>Tab. S5</b> Free energies of NO, H, H <sub>2</sub> O, and NH <sub>3</sub> on TMX <sub>4</sub> -HTPs .....                                                                                                      | S34 |
| <b>Tab. S6</b> Energy( $\Delta G_1$ ) required for the first protonation step .....                                                                                                                               | S35 |
| <b>Tab. S7</b> The energy of all the possible intermediates .....                                                                                                                                                 | S36 |

|                 |                                                                                                                                          |     |
|-----------------|------------------------------------------------------------------------------------------------------------------------------------------|-----|
| <b>Tab. S8</b>  | Transfer charge of TM atoms, and the N-O bond of adsorbed NO on TMX <sub>4</sub> -HTPs. ....                                             | S40 |
| <b>Tab. S9</b>  | Adsorption free energies of $\Delta^*G_{\text{HNO}}$ , $\Delta G^*_{\text{NOH}}$ , $\Delta G_{\text{HNO}} - \Delta G_{\text{NOH}}$ ..... | S41 |
| <b>Tab. S10</b> | $Q_x$ , $N$ , AR, IR, IE, EA, $\rho_{\text{TM}}$ , $M$ , $\chi$ of each investigated TMX <sub>4</sub> -HTPs. ....                        | S42 |

### Constant potential method

This method implements VASPsol to model the electrochemical electrode/solution interface and establish the relationship between charge and electrode potential. For each structure, thirteen different systems were performed at charges of  $-2e^-$  to  $+2e^-$  at a step of  $0.5e^-$  and the corresponding electrode potential referenced to the SHE scale could be calculated by

$$U_q(\text{V/SHE}) = (\phi_q(f) - 4.6)/e$$

where  $\phi_q(f)$  is the work function of the charging system and 4.6 V is the work function of the  $\text{H}_2/\text{H}^+$  couple under standard conditions.

Under the condition of fixed potential, the electrode potential referenced to the SHE scale is changed by pH values. The relationship is given by

$$U_{\text{RHE}} = U_{\text{SHE}} + k_{\text{B}}T \ln(10) \text{pH}/e$$

Therefore, by adjusting the charge numbers of the system, the energies under specific potentials could be calculated. However, the DFT-calculated value also includes the interaction between the electrons in the slab and the background charge. It is given by

$$E_{\text{DFT}}(n_e, n_{\text{bg}}) = E_{\text{slab}}(n_e) + E_{\text{slab-bg}}(n_e, n_{\text{bg}}) + E_{\text{bg}}(n_{\text{bg}})$$

where  $E_{\text{slab}}$  is the energy of the slab without the background,  $E_{\text{bg}}$  is the energy of the background without the slab and  $E_{\text{slab-bg}}$  is the interaction energy between the slab and the background. According to Neurock's methods,<sup>1</sup> decoupling of the slab-background interaction involves subtracting the  $E_{\text{slab-bg}}$  and  $E_{\text{bg}}$  terms, which sum to equal  $-\int_0^q \langle \bar{V}_{\text{tot}}(Q) \rangle dQ$

, where  $\langle \bar{V}_{\text{tot}}(Q) \rangle$  is the average potential in the unit cell. The  $\langle \bar{V}_{\text{tot}}(Q) \rangle$  is obtained from the LOCPOT file generated by VASP with LVHAR set as true. The average electrostatic potential in the x, y, and z directions provided by the LOCPOT

file is summed  $(\iiint V_{\text{tot}} dx dy dz)$ .  $\frac{1}{\Sigma} \iiint V_{\text{tot}} dx dy dz$  (i.e., the potential shift to reference the system to vacuum as a function of q), and  $\Sigma$  is the volume of the unit cell.

The correction results in the total electron energy,  $E_{\text{elec}}$ , defined as:

$$E_{\text{elec}} = E_{\text{DFT}} + \int_0^q \langle \bar{V}_{\text{tot}}(Q) \rangle dQ$$

where  $E_{\text{elec}}$  is equal to  $E_{\text{slab}}(n_e)$ ,  $E_{\text{DFT}}$  is equal to  $E_{\text{DFT}}(n_e, n_{\text{bg}})$ , and

$E_{\text{slab-bg}}(n_e, n_{\text{bg}}) + E_{\text{bg}}(n_{\text{bg}})$  is equal to  $-\int_0^q \langle \bar{V}_{\text{tot}}(Q) \rangle dQ$ . However, the total free energy of the system ( $E_{\text{Free}}$ ) also includes contributions for the excess electrons ( $q$ ) at the Fermi potential ( $\phi_q(f)$ ) and is equivalent to

$$E_{\text{free}}(U) = E_{\text{DFT}} + \int_0^q \langle \bar{V}_{\text{tot}}(Q) \rangle dQ - q\phi_q(f)$$

$E_{\text{free}}$  and  $U$  could be fitted to a quadratic function form, consistent with a capacitor created by the charged-slab/background-charge system, written as

$$E(U) = -\frac{1}{2}C(U - U_0)^2 + E_0$$

where  $U_0$  is the potential of zero charge (PZC),  $E_0$  is the energy at the PZC, and  $C$  is the capacitance of the surface. From the quadratic functions, the potential-dependent energy could be provided.

**The model details for Pt(100)**

The Pt(100) surface is represented by a  $3 \times 3$  unit cell with five Pt layers (total of 45 atoms per unit cell). Surface relaxation is allowed in the top three layers of the (100) slab.

### Nitric oxide reduction five-electron mechanism

The overall NORR process includes a five-electron mechanism, which consists of five elementary steps following the equations as reported in the previous literature:

|                             |                                                                                                                                                                                                                                                                                              |
|-----------------------------|----------------------------------------------------------------------------------------------------------------------------------------------------------------------------------------------------------------------------------------------------------------------------------------------|
| the first protonation step  | $* + \text{NO} + \text{H} + \text{e}^- \rightarrow * \text{HNO}(* \text{NOH})$                                                                                                                                                                                                               |
| the second protonation step | $* \text{HNO} + \text{H} + \text{e}^- \rightarrow * \text{HNOH}(* \text{H}_2\text{NO})$<br>$* \text{NOH} + \text{H} + \text{e}^- \rightarrow * \text{HNOH}(* \text{N} + \text{H}_2\text{O})$                                                                                                 |
| the third protonation step  | $* \text{HNOH} + \text{H} + \text{e}^- \rightarrow * \text{H}_2\text{NOH}(* \text{NH} + \text{H}_2\text{O})$<br>$* \text{H}_2\text{NO} + \text{H} + \text{e}^- \rightarrow * \text{H}_2\text{NOH}(* \text{O} + \text{NH}_3)$<br>$* \text{N} + \text{H} + \text{e}^- \rightarrow * \text{NH}$ |
| the fourth protonation step | $* \text{NH} + \text{H} + \text{e}^- \rightarrow * \text{NH}_2$<br>$* \text{H}_2\text{NOH} + \text{H} + \text{e}^- \rightarrow * \text{NH}_2 + \text{H}_2\text{O}$<br>$* \text{H}_2\text{NOH} + \text{H} + \text{e}^- \rightarrow * \text{OH} + \text{NH}_3$                                 |
| the fifth protonation step  | $* \text{NH}_2 + \text{H} + \text{e}^- \rightarrow * \text{NH}_3$<br>$* \text{OH} + \text{H} + \text{e}^- \rightarrow * \text{H}_2\text{O}$                                                                                                                                                  |

where \* represents the active site on the catalyst, and \*HNO, \*NOH, \*HNOH, \*H<sub>2</sub>NO, \*N, \*H<sub>2</sub>NOH, \*O, \*NH, \*NH<sub>2</sub>, \*OH, \*NH<sub>3</sub>, and \*H<sub>2</sub>O are the correspond adsorbed intermediates, respectively.

### Detailed descriptions and computational details of SISO method

SISO is a data-driven method combining symbolic regression and compressed sensing to produce explicit mathematical expressions.<sup>2,3</sup> The main steps of this method are: (1) uniformly sample a sufficient number of reliable data points; (2) identify key features based on domain knowledge or intuition; (3) construct a large feature space through feature transformations to better describe target properties; (4) assume that target properties can be linearly expanded in the feature space and solve for the sparse solution of the linear model. In this work, the initial feature space comprises 13 primary features  $\Phi_0 = [Q_x, Q_{TM}, Ne, N, AR, IR, IE, EA, \rho_{TM}, M, \chi, U^{\circ}_{diss}, \mu_{TM}]$ , and the mathematical operations for feature construction are  $(+, -, \times, /, ^{-1}, ^2, ^3, |-, \sqrt{\cdot}, \sqrt[3]{\cdot})$ . With these primary features and mathematical operations, a large number of expressions are generated. The SISO code is available at <http://github.com/rouyang2017/SISO>.



## One-dimensional descriptors of TMX4-HTPs

The  $\Delta G^*_{\text{NO}}$  is depicted as:

$$\Delta G^*_{\text{NO}} (\text{SISSO}) = -38.97 \times \frac{\text{IE} \times \left(\frac{\mu_{\text{TM}}}{M}\right)^2}{Q_X \times N \times N_e} + 1.17$$

The  $\Delta G^*_{\text{H}}$  is depicted as:

$$\Delta G^*_{\text{H}} (\text{SISSO}) = -0.38 \times \left( \frac{(Q_X - N) \times N_e + (N - N_e) \times N}{\mu_{\text{TM}}} \right) - 2.35$$

The  $\Delta G^*_{\text{H}_2\text{O}}$  is depicted as:

$$\Delta G^*_{\text{H}_2\text{O}} (\text{SISSO}) = -0.26 \times \left( \frac{e^{N_e} \times N \times \rho_{\text{TM}} \times \ln Q_X}{N + N_e} \right) \times 10^{-1} - 3.36$$

The  $\Delta G^*_{\text{NH}_3}$  is depicted as:

$$\Delta G^*_{\text{NH}_3} (\text{SISSO}) = -1132.82 \times \frac{\mu_{\text{TM}}^2}{N \times \rho_{\text{TM}} \times \sqrt{Q_X} \times N_e \times \text{AR}} + 1.17$$

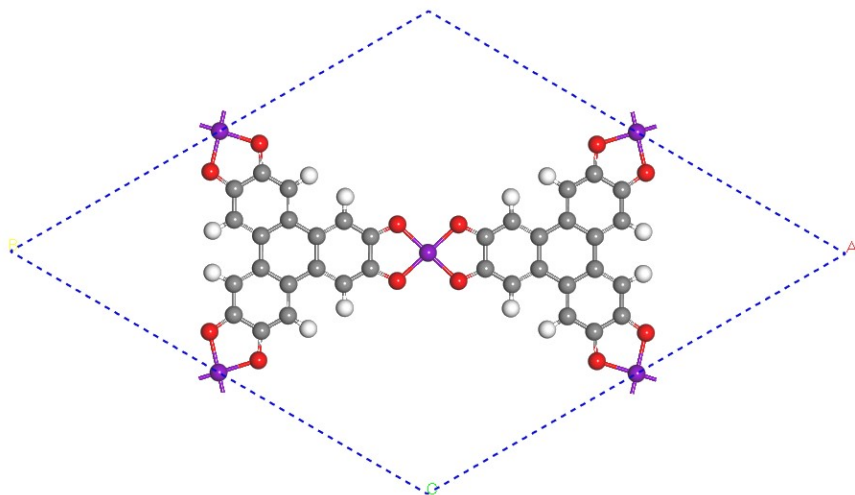

**Fig. S1** Top view of TMX<sub>4</sub>-HTP monolayer.

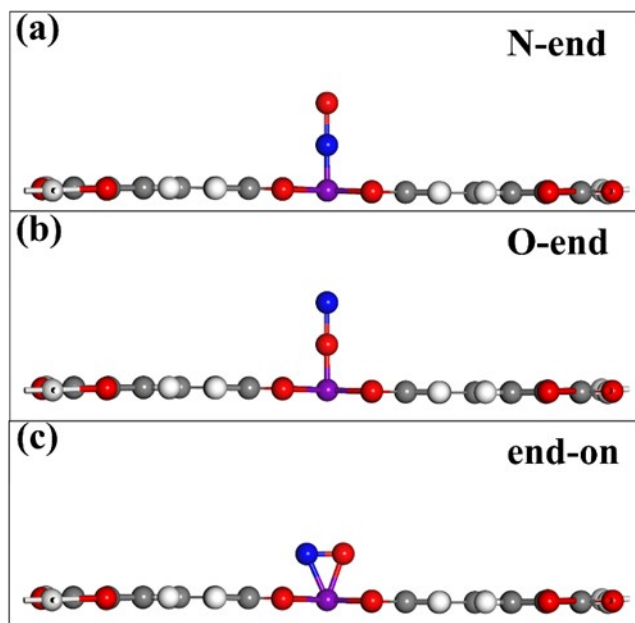

**Fig. S2** Three possible adsorption patterns of NO on TMX<sub>4</sub>-HTPs.

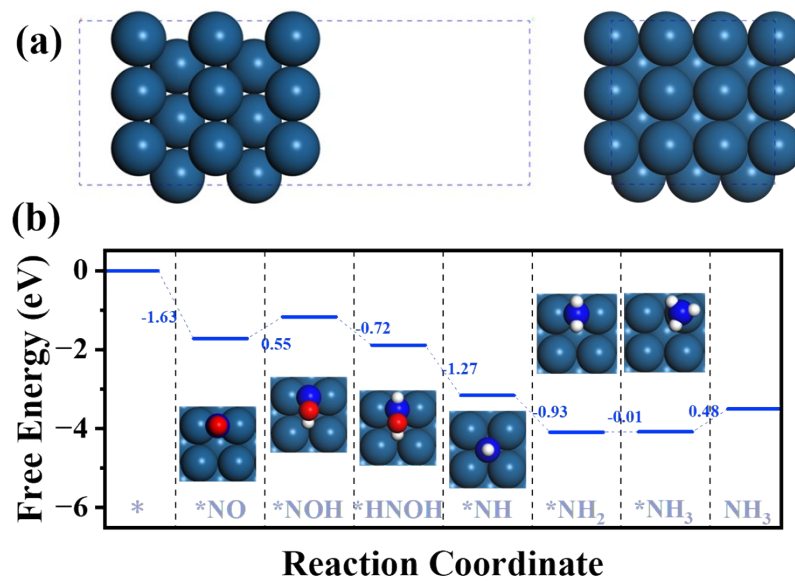

**Fig. S3** (a) The side and top views of the Pt(100), (b) The energy profile of the protonation processes for Pt(100)

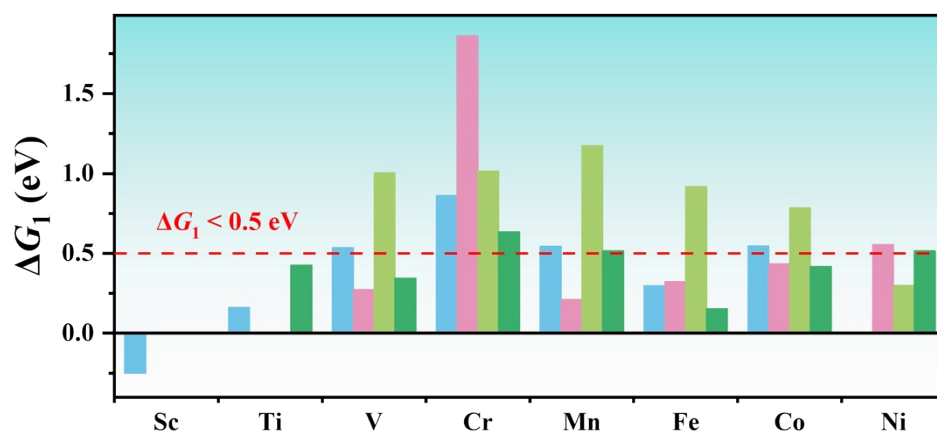

**Fig. S4** Energy( $\Delta G_1$ ) required for the first protonation step of  $\text{NO} + \text{H}^+ + \text{e}^- \rightarrow \text{HNO}(\text{NOH})$ .

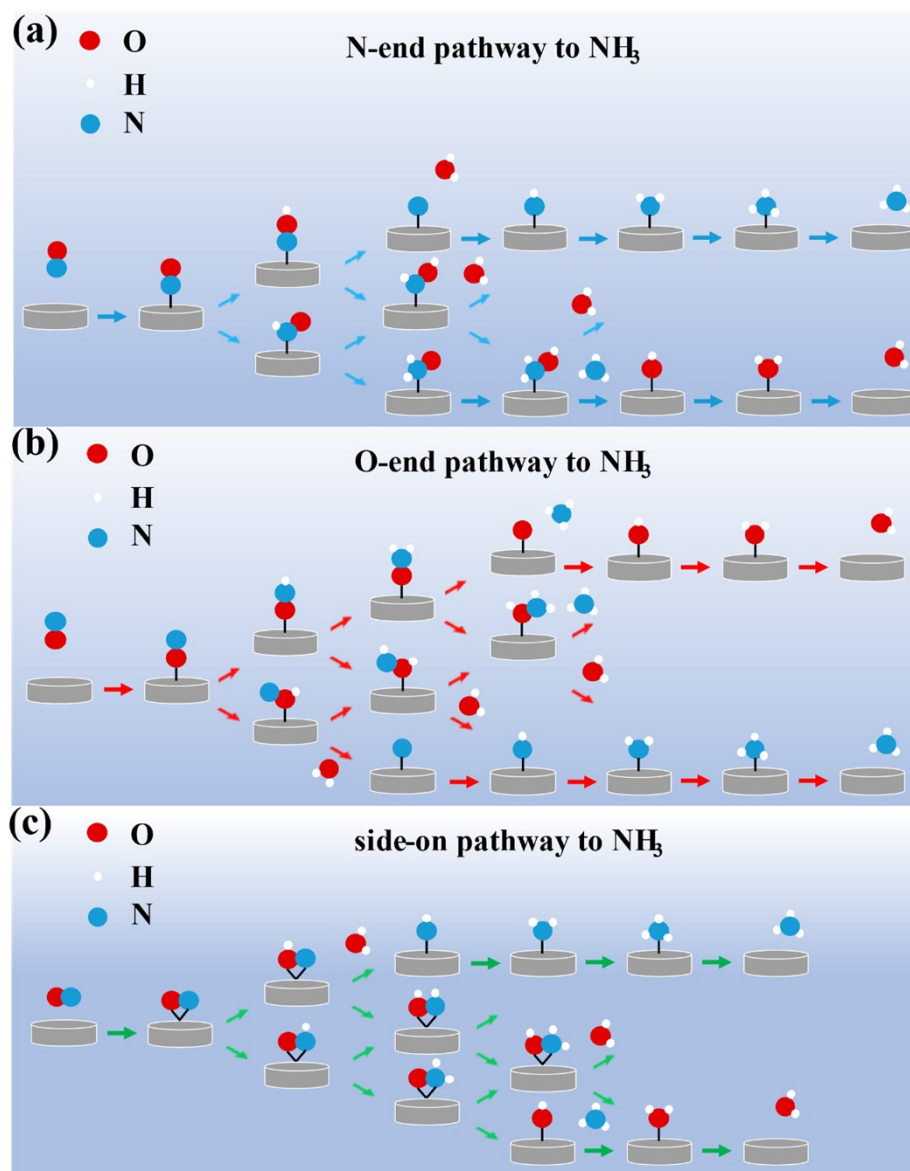

**Fig. S5** Schematic pathways of the NORR process toward  $\text{NH}_3$  synthesis.

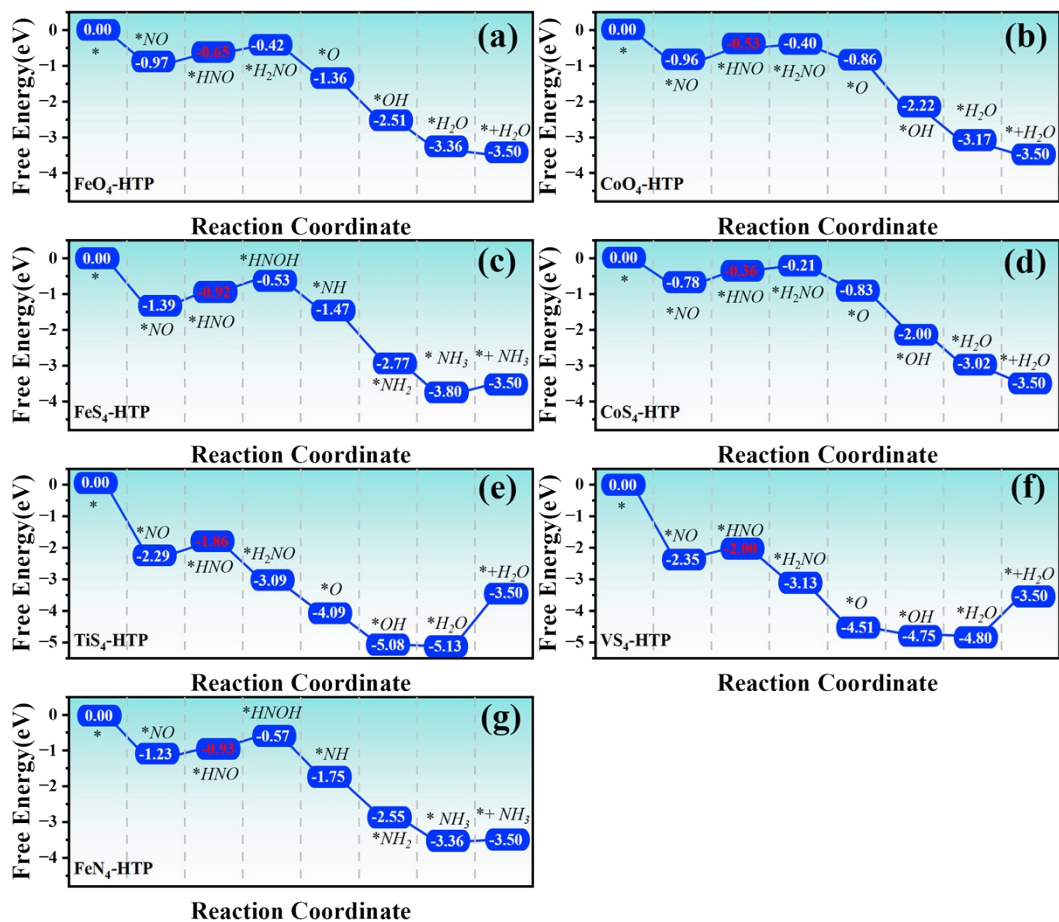

**Fig. S6** Free energy diagrams of electrochemical NO-to-NH<sub>3</sub> conversion on (a) FeO<sub>4</sub>-HTP, (b) CoO<sub>4</sub>-HTP, (c) FeS<sub>4</sub>-HTP, (d) CoS<sub>4</sub>-HTP, (e) TiS<sub>4</sub>-HTP, (f) VS<sub>4</sub>-HTP, and (g) FeN<sub>4</sub>-HTP.

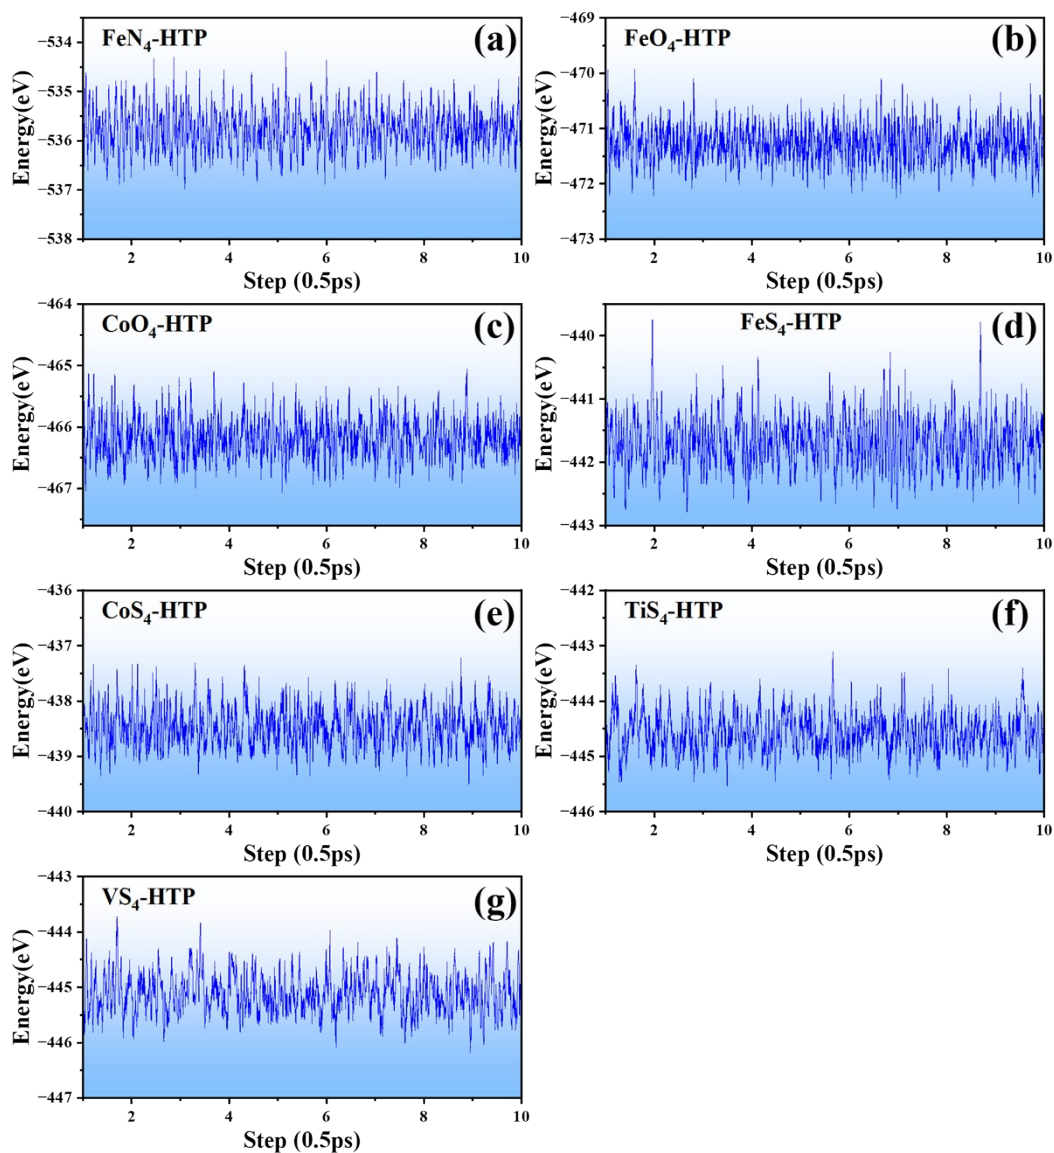

**Fig. S7** Energy profile for *ab initio* molecular dynamics (AIMD) simulation on (a) FeN<sub>4</sub>-HTP, (b) FeO<sub>4</sub>-HTP, (c) MnO<sub>4</sub>-HTP, (d) CoO<sub>4</sub>-HTP, (e) FeS<sub>4</sub>-HTP, (f) CoO<sub>4</sub>-HTP, (g) TiS<sub>4</sub>-HTP, and (h) VS<sub>4</sub>-HTP after 10 ps at 350 K, where the energy fluctuation is caused by thermal disturbance of temperature.



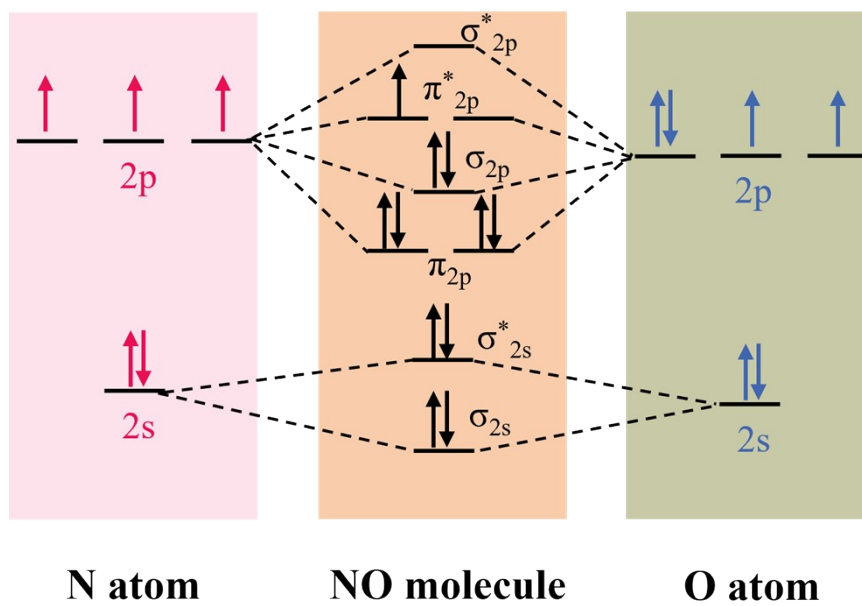

**Fig. S8** The molecular orbital diagram of NO.

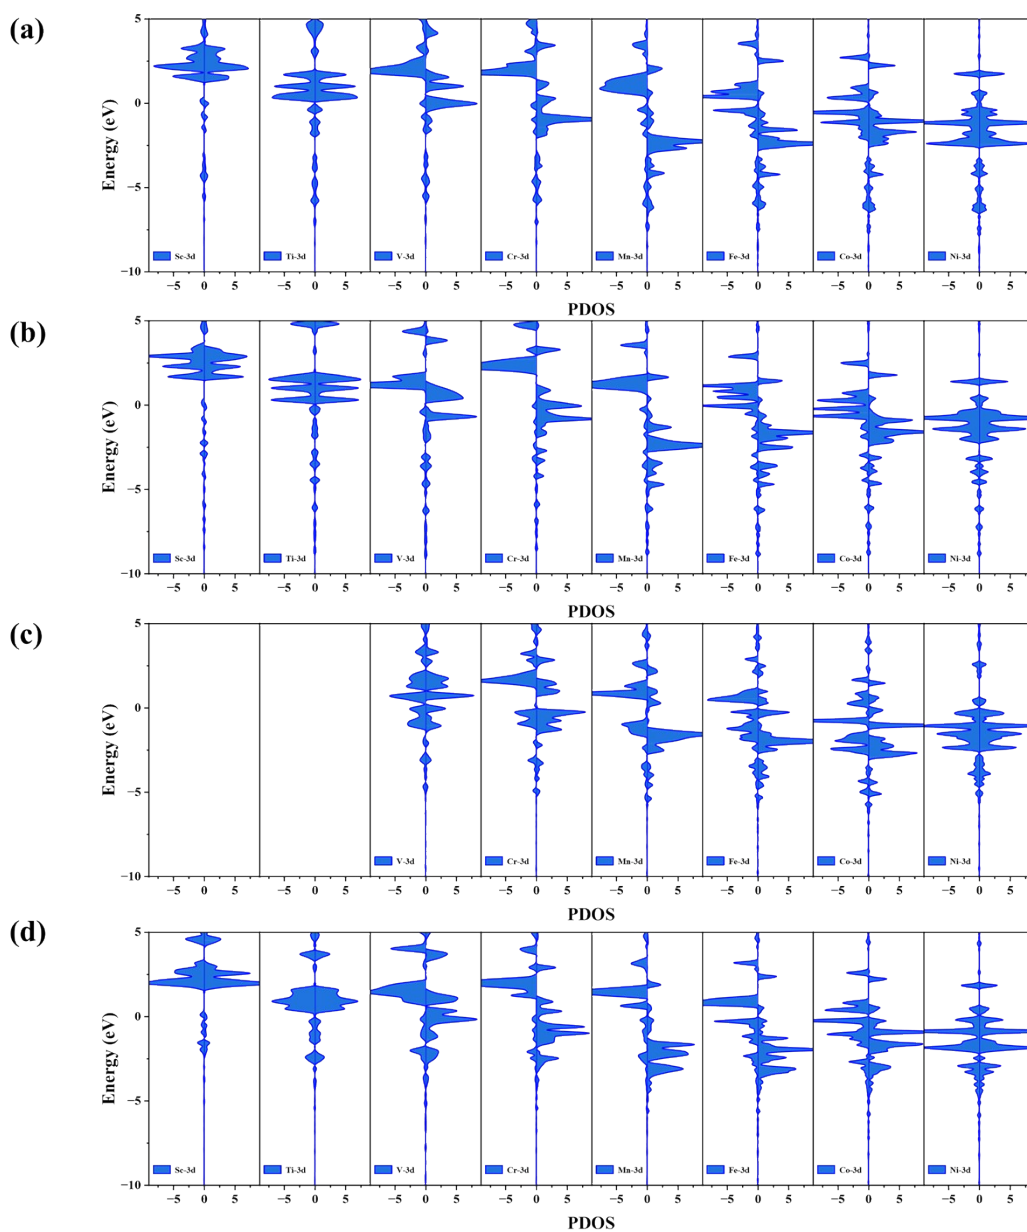

**Fig. S9** Partial density of states (PDOS) of (a)TMN<sub>4</sub>-HTPs, (b)TMO<sub>4</sub>-HTPs, (c) TMP<sub>4</sub>-HTPs, and (d)TMS<sub>4</sub>-HTPs. The Fermi level is set to 0 eV.

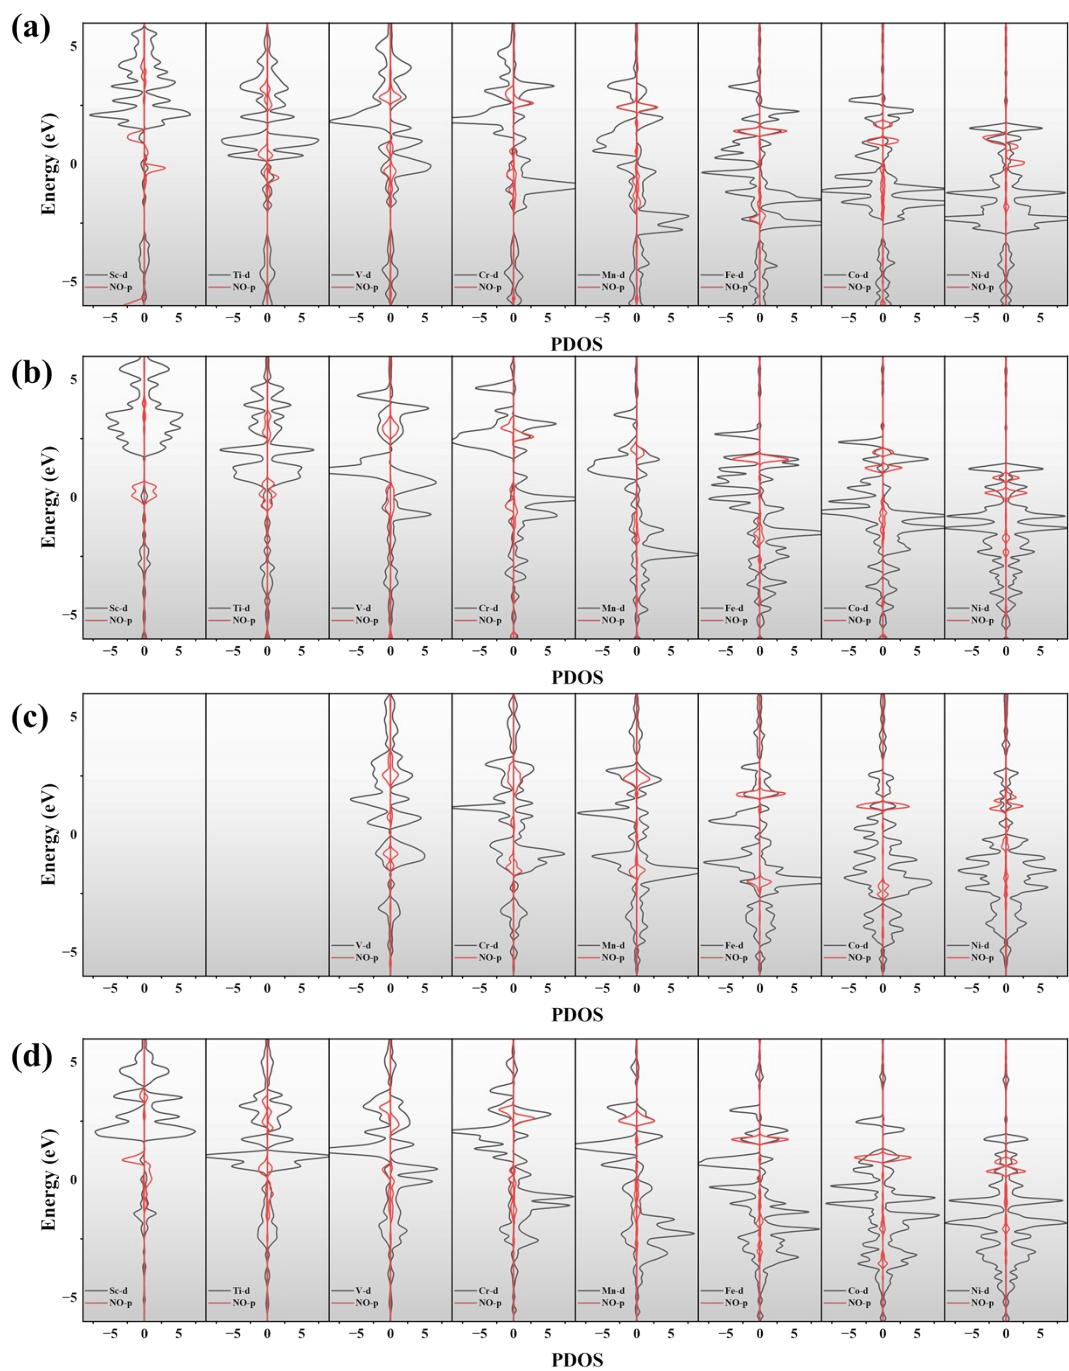

**Fig. S10** PDOS of NO-adsorbed (a)TMN<sub>4</sub>-HTPs, (b)TMO<sub>4</sub>-HTPs, (c) TMP<sub>4</sub>-HTPs, and (d)TMS<sub>4</sub>-HTPs. The Fermi level is set to 0 eV.

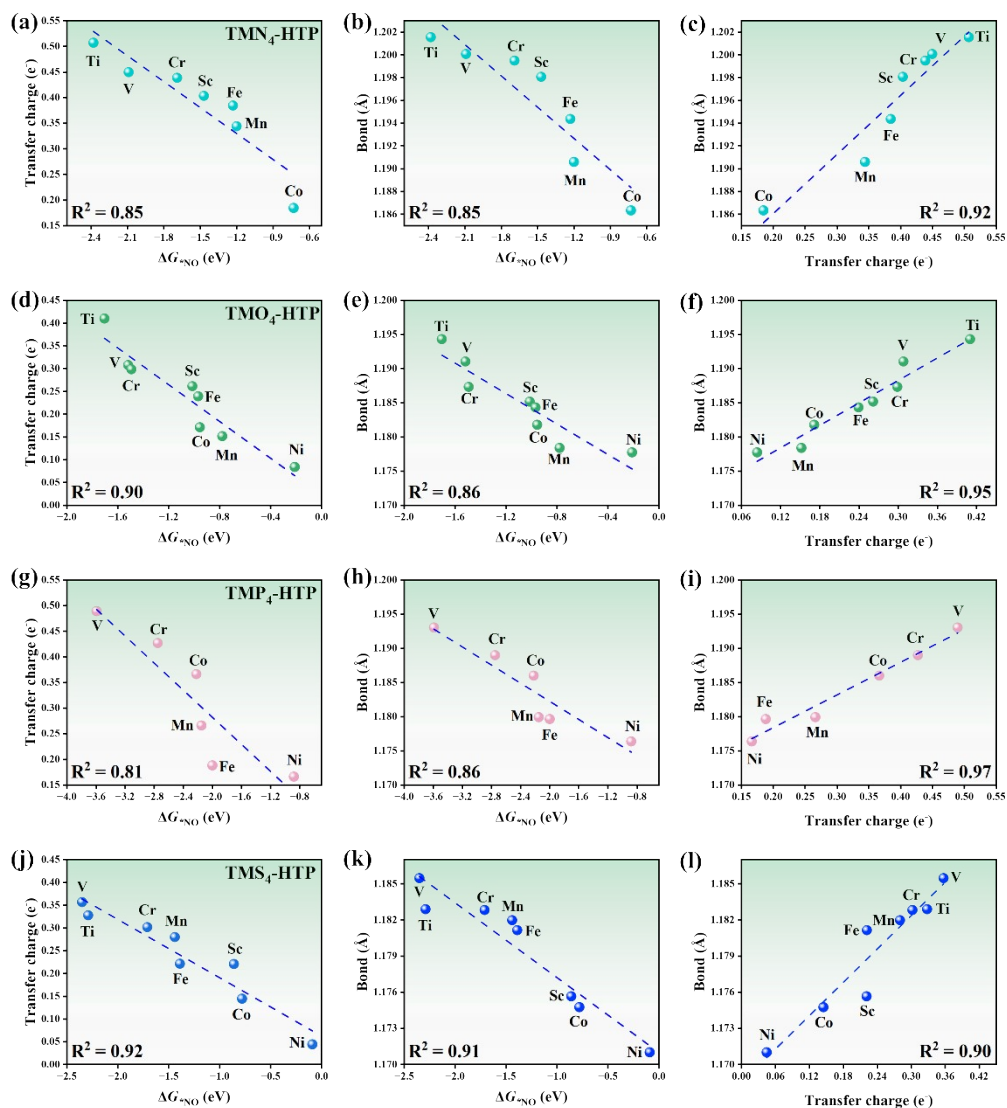

**Fig. S11** Scaling relationship among free energies of NO ( $\Delta G_{*NO}$ ), transfer charge of TM atoms ( $Q_{TM}$ ), and the N-O bond of adsorbed NO ( $d_{N-O}$ ) on TMX<sub>4</sub>-HTPs.

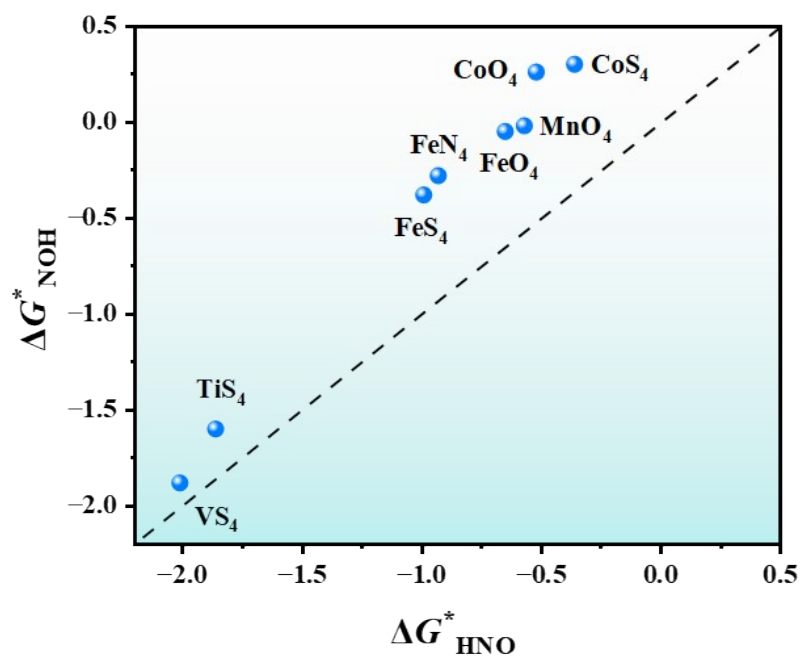

**Fig. S12** Adsorption free energies of HNO ( $\Delta G^*_{\text{HNO}}$ ), NOH ( $\Delta G^*_{\text{NOH}}$ ).

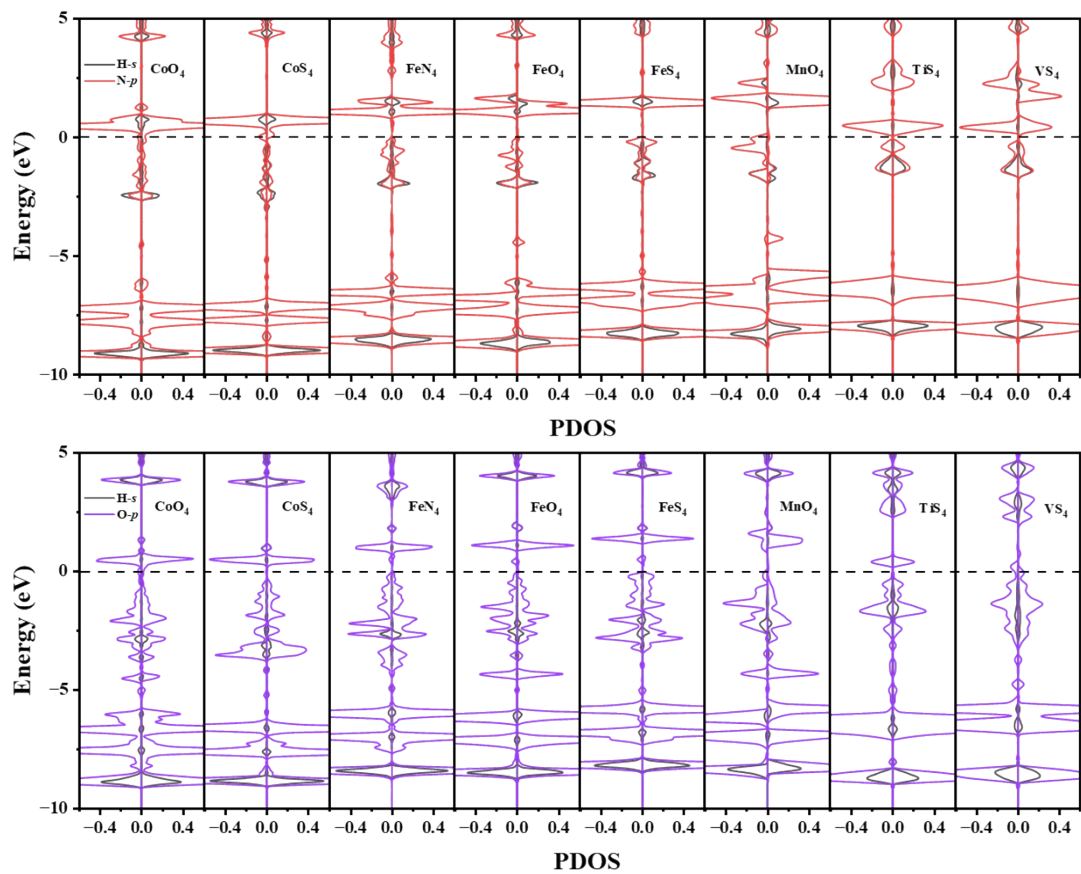

**Fig. S13** PDOS of MnO<sub>4</sub>-HTP adsorbed with HNO and NOH. The Fermi level is set to 0 eV.

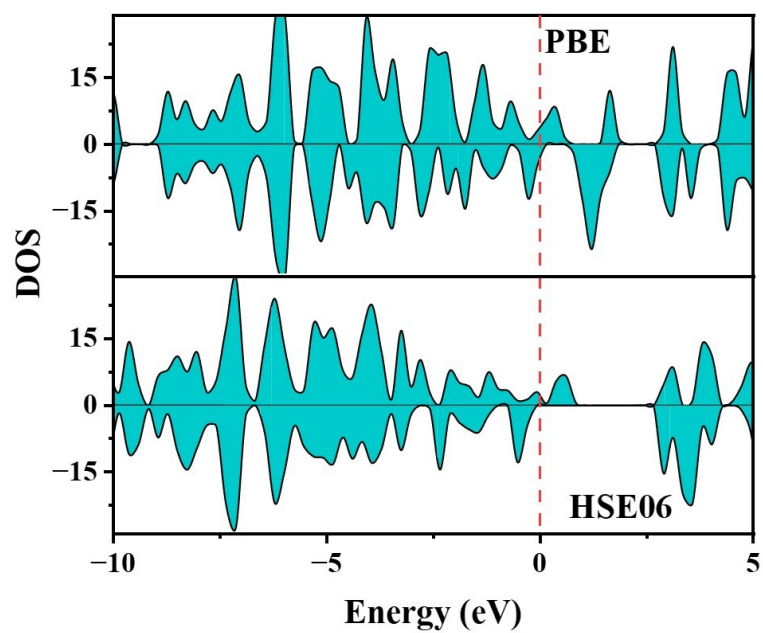

**Fig. S14** The PBE functional and Heyd-Scuseria-Ernzerhof (HSE06) hybrid functional are adopted to calculate the PDOS of MnO<sub>4</sub>-HTP.

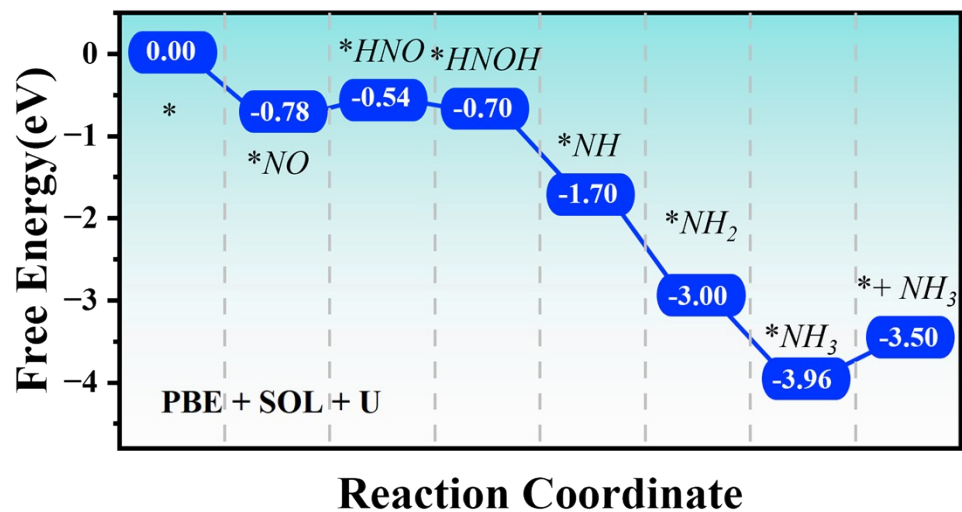

**Fig. S15** Free energy diagrams of electrochemical NO-to-NH<sub>3</sub> conversion on MnO<sub>4</sub>-HTP by PBE+SOL+U.



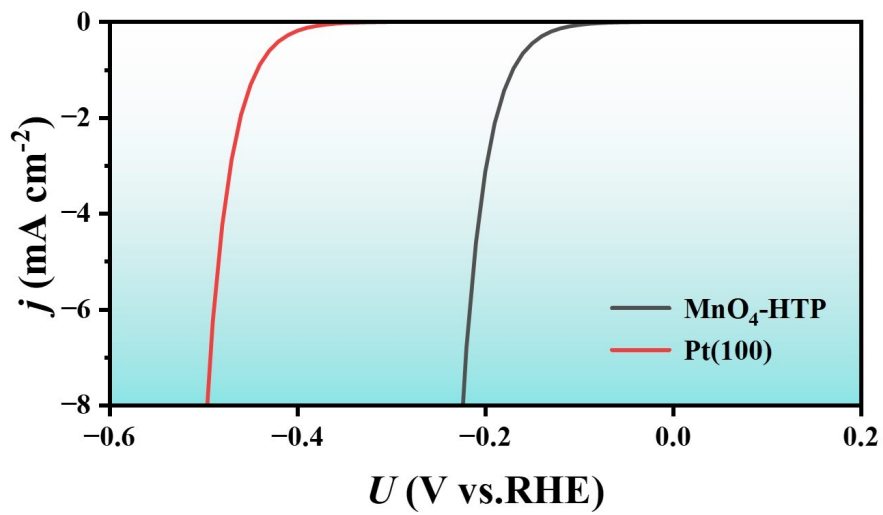

**Fig. S16** Simulated polarization curve of MnO<sub>4</sub>-HTP and Pt (100).

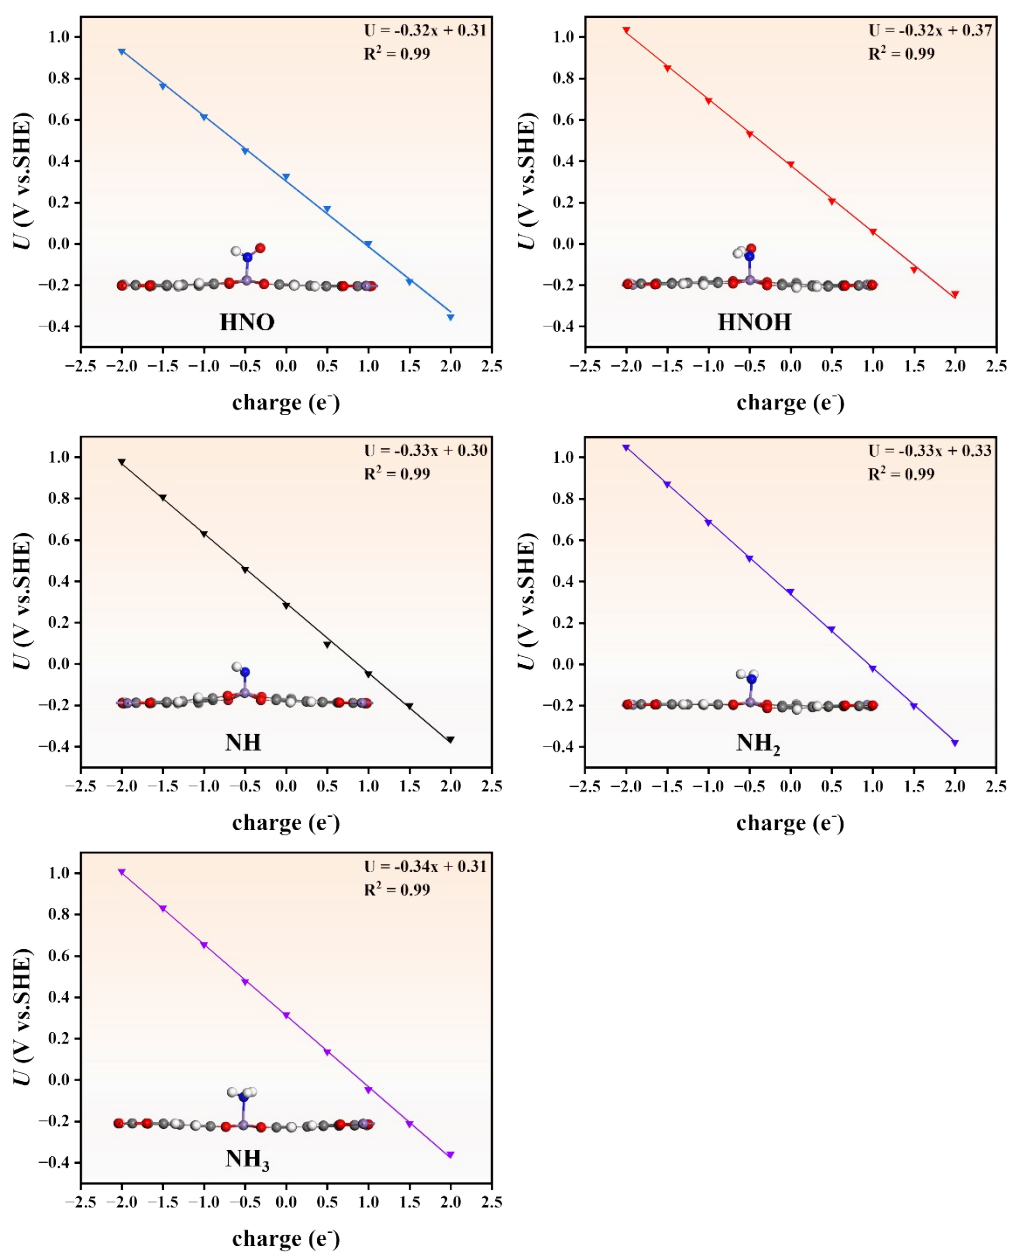

**Fig. S17** Total energies of \*HNO, \*HNOH, \*NH, \*NH<sub>2</sub> and \*NH<sub>3</sub> as a function of applied potential  $U$ . The calculated total energy is represented by triangles, and the fitting data is represented by solid lines.

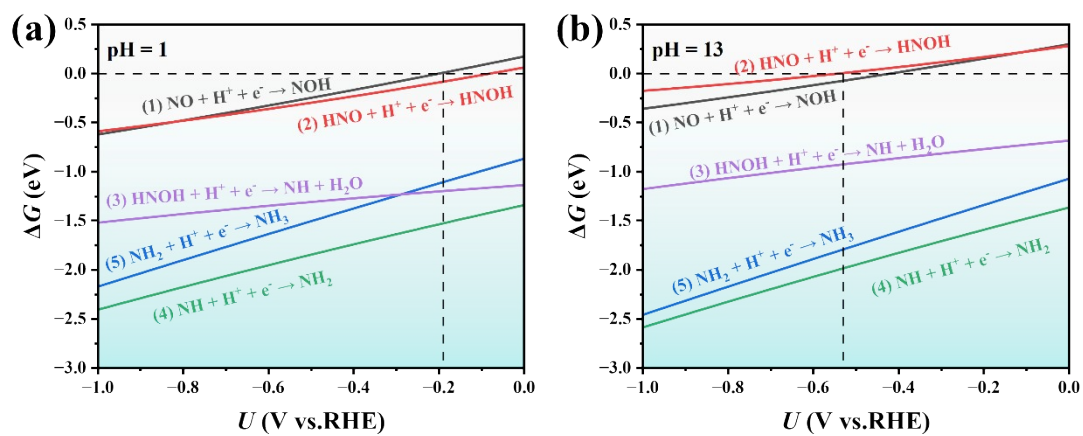

**Fig. S18** The free energy curves of  $\text{MnO}_4\text{-HTP}$  under varying electrode potentials at (a)  $\text{pH}=1$ , and (b)  $\text{pH}=13$ .

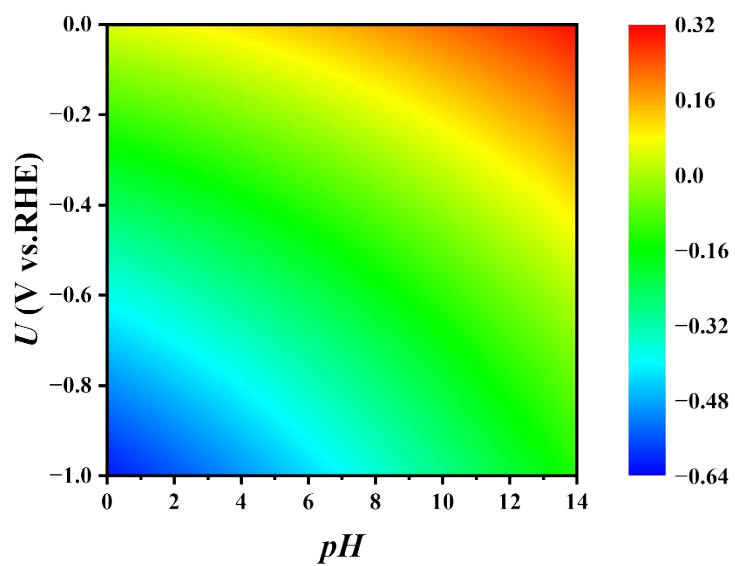

**Fig. S19** pH-dependent and potential-dependent contour plot of the reaction energy for the second protonation step.

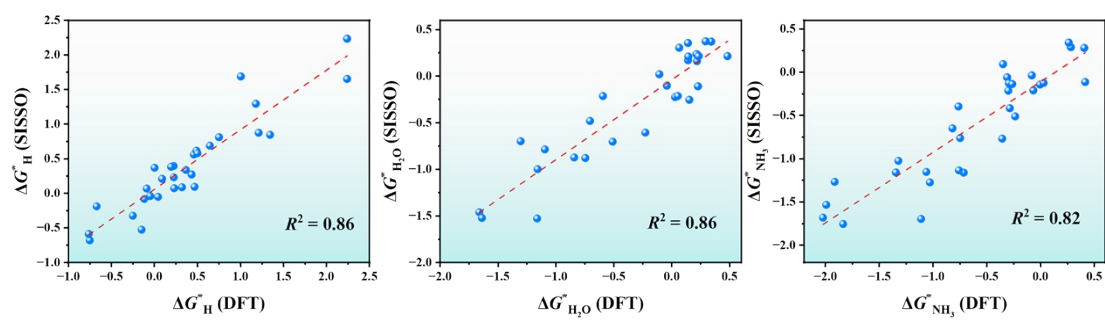

**Fig. S20** The DFT-calculated  $\Delta G^*_{\text{H}}$ ,  $\Delta G^*_{\text{H}_2\text{O}}$  and  $\Delta G^*_{\text{NH}_3}$  values of TMX<sub>4</sub>-HTP were compared with the SISSO predicted values.

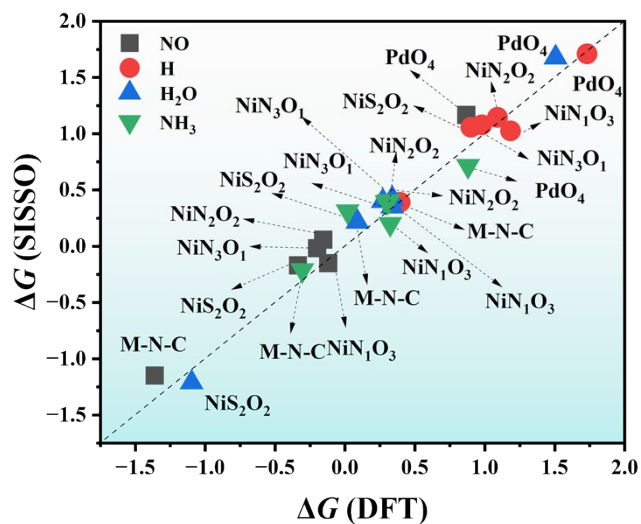

**Fig S21** Comparison of DFT-calculated  $\Delta G^*_{\text{H}}$ ,  $\Delta G^*_{\text{H}_2\text{O}}$  and  $\Delta G^*_{\text{NH}_3}$  values with the SISSO-predicted values.

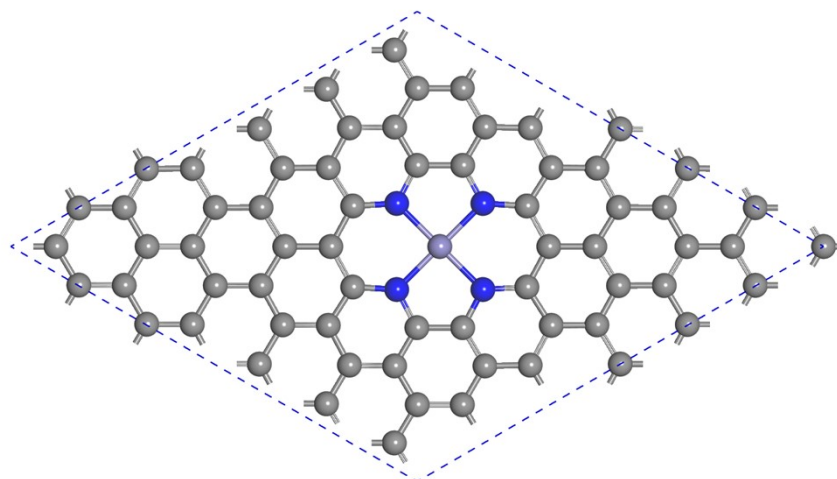

**Fig. S22** The structure of Fe–N–C. The Fe–N–C SAC was modeled by a FeN<sub>4</sub> site embedded into a monolayer graphene in an orthorhombic cell with the lattice parameter of  $a = 15.16 \text{ \AA}$  and  $b = 20 \text{ \AA}$ .

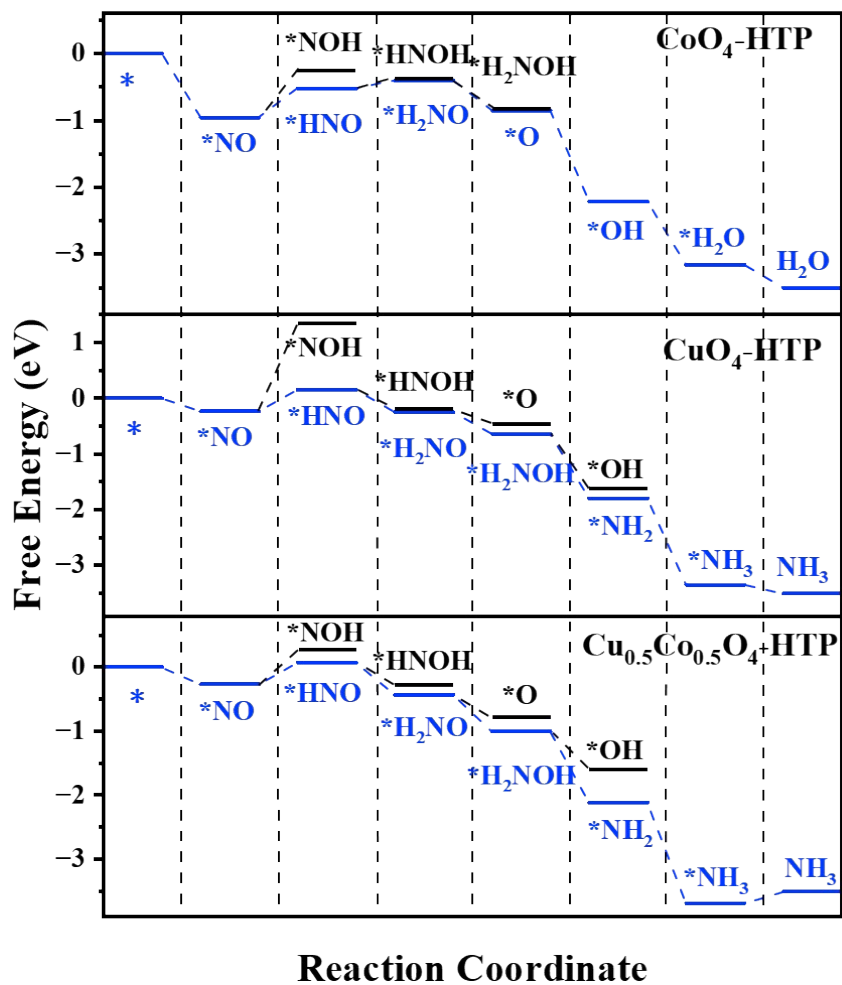

**Fig. S23** Free energy diagrams of electrochemical NO-to- $\text{NH}_3$  conversion on  $\text{CoO}_4\text{-HTP}$ ,  $\text{CuO}_4\text{-HTP}$  and  $\text{Cu}_{0.5}\text{Co}_{0.5}\text{O}_4\text{-HTP}$ .



**Tab. S1:** Calculated energies of MnO<sub>4</sub>-HTP at different vacuum spaces, using the energy of MnO<sub>4</sub>-HTP at a 12 Å vacuum space as the reference.

| Vacuum space (Å) | $\Delta E_{*NO}$ (eV) | $\Delta E_{*HNO}$ (eV) |
|------------------|-----------------------|------------------------|
| 12               | 0.00                  | 0.00                   |
| 15               | 0.00                  | 0.02                   |
| 20               | 0.00                  | 0.02                   |
| 30               | -0.01                 | 0.00                   |

**Tab. S2** TMX<sub>4</sub>-HTP energy and lattice length a, b

| TMN <sub>4</sub> -HTP | Energy (eV) | a = b (Å) | TMO <sub>4</sub> -HTP | Energy (eV) | a = b (Å) |
|-----------------------|-------------|-----------|-----------------------|-------------|-----------|
| Sc                    | -540.60     | 22.88     | Sc                    | -480.37     | 22.37     |
| Ti                    | -542.85     | 22.47     | Ti                    | -482.29     | 22.02     |
| V                     | -543.24     | 22.39     | V                     | -481.94     | 21.91     |
| Cr                    | -544.50     | 22.23     | Cr                    | -480.77     | 21.84     |
| Mn                    | -543.62     | 22.16     | Mn                    | -479.86     | 21.71     |
| Fe                    | -539.41     | 22.02     | Fe                    | -474.16     | 21.63     |
| Co                    | -535.84     | 21.86     | Co                    | -469.20     | 21.45     |
| Ni                    | -530.91     | 21.85     | Ni                    | -464.51     | 21.44     |
| TMP <sub>4</sub> -HTP | Energy (eV) | a = b (Å) | TMS <sub>4</sub> -HTP | Energy (eV) | a = b (Å) |
| Sc                    | -489.84     | 25.43     | Sc                    | -444.02     | 24.25     |
| Ti                    | -493.00     | 24.96     | Ti                    | -446.77     | 23.89     |
| V                     | -494.91     | 24.52     | V                     | -447.32     | 23.75     |
| Cr                    | -496.60     | 24.32     | Cr                    | -448.77     | 23.57     |
| Mn                    | -496.98     | 24.14     | Mn                    | -448.36     | 23.49     |
| Fe                    | -494.79     | 23.99     | Fe                    | -445.06     | 23.34     |
| Co                    | -490.79     | 23.87     | Co                    | -441.46     | 23.19     |
| Ni                    | -487.44     | 23.76     | Ni                    | -437.26     | 23.15     |

**Tab. S3** Computed the total energy of a metal atom in its most stable bulk structure ( $\mu_{\text{TM}}$ ), formation energy ( $E_f$ ), standard dissolution potential ( $U_{\text{diss}}^\circ$ ) of metal atoms, the number of transferred electrons ( $N_e$ ) during the dissolution, and dissolution potential ( $U_{\text{diss}}$ ) of metals.

| TMN <sub>4</sub> -HTP | $\mu_{\text{TM}}$ (eV) | $E_f$ (eV) | $U_{\text{diss}}^\circ$ (V) | $N_e$ | $U_{\text{diss}}$ (V) |
|-----------------------|------------------------|------------|-----------------------------|-------|-----------------------|
| Sc                    | -6.34                  | -7.75      | -2.08                       | 3     | 0.50                  |
| Ti                    | -7.9                   | -6.94      | -1.63                       | 2     | 1.84                  |
| V                     | -9.09                  | -5.88      | -1.18                       | 2     | 1.76                  |
| Cr                    | -9.64                  | -5.75      | -0.91                       | 2     | 1.97                  |
| Mn                    | -9.16                  | -5.94      | -1.19                       | 2     | 1.78                  |
| Fe                    | -8.46                  | -5.24      | -0.45                       | 2     | 2.17                  |
| Co                    | -7.11                  | -5.23      | -0.28                       | 2     | 2.33                  |
| Ni                    | -5.78                  | -5.08      | -0.26                       | 2     | 2.28                  |
| TMO <sub>4</sub> -HTP | $\mu_{\text{TM}}$ (eV) | $E_f$ (eV) | $U_{\text{diss}}^\circ$ (V) | $N_e$ | $U_{\text{diss}}$ (V) |
| Sc                    | -6.34                  | -9.09      | -2.08                       | 3     | 0.95                  |
| Ti                    | -7.9                   | -8.17      | -1.63                       | 2     | 2.45                  |
| V                     | -9.09                  | -6.86      | -1.18                       | 2     | 2.25                  |
| Cr                    | -9.64                  | -5.92      | -0.91                       | 2     | 2.05                  |
| Mn                    | -9.16                  | -6.10      | -1.19                       | 2     | 1.86                  |
| Fe                    | -8.46                  | -4.90      | -0.45                       | 2     | 2.00                  |
| Co                    | -7.11                  | -4.59      | -0.28                       | 2     | 2.02                  |
| Ni                    | -5.78                  | -4.36      | -0.26                       | 2     | 1.92                  |
| TMP <sub>4</sub> -HTP | $\mu_{\text{TM}}$ (eV) | $E_f$ (eV) | $U_{\text{diss}}^\circ$ (V) | $N_e$ | $U_{\text{diss}}$ (V) |
| Sc                    | -6.34                  | -3.68      | -2.08                       | 3     | -0.85                 |
| Ti                    | -7.9                   | -3.17      | -1.63                       | 2     | -0.04                 |
| V                     | -9.09                  | -2.62      | -1.18                       | 2     | 0.13                  |
| Cr                    | -9.64                  | -2.63      | -0.91                       | 2     | 0.41                  |
| Mn                    | -9.16                  | -3.24      | -1.19                       | 2     | 0.43                  |
| Fe                    | -8.46                  | -3.21      | -0.45                       | 2     | 1.16                  |
| Co                    | -7.11                  | -3.23      | -0.28                       | 2     | 1.34                  |
| Ni                    | -5.78                  | -3.34      | -0.26                       | 2     | 1.41                  |
| TMS <sub>4</sub> -HTP | $\mu_{\text{TM}}$ (eV) | $E_f$ (eV) | $U_{\text{diss}}^\circ$ (V) | $N_e$ | $U_{\text{diss}}$ (V) |
| Sc                    | -6.34                  | -6.80      | -2.08                       | 3     | 0.19                  |
| Ti                    | -7.9                   | -6.16      | -1.63                       | 2     | 1.45                  |
| V                     | -9.09                  | -5.15      | -1.18                       | 2     | 1.39                  |
| Cr                    | -9.64                  | -5.08      | -0.91                       | 2     | 1.63                  |
| Mn                    | -9.16                  | -5.43      | -1.19                       | 2     | 1.52                  |
| Fe                    | -8.46                  | -5.03      | -0.45                       | 2     | 2.06                  |
| Co                    | -7.11                  | -5.17      | -0.28                       | 2     | 2.31                  |
| Ni                    | -5.78                  | -5.11      | -0.26                       | 2     | 2.29                  |

**Tab. S4** Free energies of NO on  $\text{TMX}_4\text{-HTPs}$  with N-end, O-end, and side-on patterns, the lowest energies are highlighted in red.

| $\text{TMN}_4\text{-HTP}$ | N-end (eV) | O-end (eV) | side-on (eV) | $\text{TMO}_4\text{-HTP}$ | N-end (eV) | O-end (eV) | side-on (eV) |
|---------------------------|------------|------------|--------------|---------------------------|------------|------------|--------------|
| Sc                        | -1.47      | -0.63      | NAN          | Sc                        | -1.01      | -0.67      | NAN          |
| Ti                        | -2.38      | -0.96      | -1.28        | Ti                        | -1.70      | -1.29      | -1.41        |
| V                         | -2.09      | -0.84      | -1.58        | V                         | -1.52      | -0.31      | -0.96        |
| Cr                        | -1.69      | -0.10      | -0.76        | Cr                        | -1.49      | 0.01       | -0.65        |
| Mn                        | -1.20      | 0.35       | -0.30        | Mn                        | -0.78      | NAN        | NAN          |
| Fe                        | -1.23      | 0.28       | NAN          | Fe                        | -0.97      | 0.23       | NAN          |
| Co                        | -0.73      | 0.43       | NAN          | Co                        | -0.96      | 0.12       | NAN          |
| Ni                        | 0.07       | 0.65       | NAN          | Ni                        | -0.21      | NAN        | NAN          |
| $\text{TMP}_4\text{-HTP}$ | N-end (eV) | O-end (eV) | side-on (eV) | $\text{TMS}_4\text{-HTP}$ | N-end (eV) | O-end (eV) | side-on (eV) |
| Sc                        | NAN        | NAN        | NAN          | Sc                        | -0.86      | -0.17      | NAN          |
| Ti                        | NAN        | NAN        | NAN          | Ti                        | -2.29      | -1.42      | NAN          |
| V                         | -3.59      | -1.26      | -2.67        | V                         | -2.35      | -1.24      | -1.51        |
| Cr                        | -2.75      | -0.73      | -1.61        | Cr                        | -1.71      | -0.05      | NAN          |
| Mn                        | -2.15      | -0.17      | -0.79        | Mn                        | -1.44      | 0.42       | -0.69        |
| Fe                        | -2.00      | -0.09      | NAN          | Fe                        | -1.39      | 0.44       | -0.19        |
| Co                        | -2.22      | NAN        | NAN          | Co                        | -0.78      | 0.30       | NAN          |
| Ni                        | -0.88      | -0.87      | -0.67        | Ni                        | -0.09      | NAN        | NAN          |

**Tab. S5** Free energies of NO ( $\Delta G^*_{\text{NO}}$ ), H ( $\Delta G^*_{\text{H}}$ ), H<sub>2</sub>O molecules ( $\Delta G^*_{\text{H}_2\text{O}}$ ), and NH<sub>3</sub> molecules ( $\Delta G^*_{\text{NH}_3}$ ) on TMX<sub>4</sub>-HTPs, the lowest energies are highlighted in red.

| TMN <sub>4</sub> -HTP | $\Delta G^*_{\text{NO}}$ | $\Delta G^*_{\text{H}}$ | $\Delta G^*_{\text{H}_2\text{O}}$ | $\Delta G^*_{\text{NH}_3}$ |
|-----------------------|--------------------------|-------------------------|-----------------------------------|----------------------------|
| Sc                    | -1.47                    | 2.24                    | -0.74                             | -0.71                      |
| Ti                    | -2.38                    | -0.09                   | -1.16                             | -1.11                      |
| V                     | -2.09                    | 0.04                    | -0.51                             | -1.03                      |
| Cr                    | -1.69                    | 0.23                    | 0.23                              | -0.35                      |
| Mn                    | -1.20                    | 0.46                    | 0.22                              | 0.00                       |
| Fe                    | -1.23                    | 0.22                    | 0.23                              | -0.06                      |
| Co                    | -0.73                    | 0.43                    | 0.22                              | 0.42                       |
| Ni                    | NAN                      | NAN                     | NAN                               | NAN                        |
| TMO <sub>4</sub> -HTP | $\Delta G^*_{\text{NO}}$ | $\Delta G^*_{\text{H}}$ | $\Delta G^*_{\text{H}_2\text{O}}$ | $\Delta G^*_{\text{NH}_3}$ |
| Sc                    | -1.01                    | 2.24                    | -1.09                             | -1.32                      |
| Ti                    | -1.70                    | 0.00                    | -1.66                             | -1.99                      |
| V                     | -1.52                    | 0.09                    | -0.23                             | -0.76                      |
| Cr                    | -1.49                    | 0.37                    | -0.11                             | -0.82                      |
| Mn                    | -0.78                    | 1.35                    | 0.07                              | -0.31                      |
| Fe                    | -0.97                    | 0.65                    | 0.14                              | -0.29                      |
| Co                    | -0.96                    | 0.49                    | 0.34                              | -0.08                      |
| Ni                    | -0.21                    | 1.18                    | 0.29                              | 0.26                       |
| TMP <sub>4</sub> -HTP | $\Delta G^*_{\text{NO}}$ | $\Delta G^*_{\text{H}}$ | $\Delta G^*_{\text{H}_2\text{O}}$ | $\Delta G^*_{\text{NH}_3}$ |
| Sc                    | NAN                      | NAN                     | NAN                               | NAN                        |
| Ti                    | NAN                      | NAN                     | NAN                               | NAN                        |
| V                     | -3.59                    | -0.75                   | -1.16                             | -1.83                      |
| Cr                    | -2.75                    | -0.15                   | -0.71                             | -1.34                      |
| Mn                    | -2.15                    | -0.12                   | 0.15                              | -0.28                      |
| Fe                    | -2.00                    | -0.25                   | 0.03                              | -0.23                      |
| Co                    | -2.22                    | -0.76                   | -0.59                             | -0.76                      |
| Ni                    | -0.88                    | -0.67                   | 0.05                              | -0.35                      |
| TMS <sub>4</sub> -HTP | $\Delta G^*_{\text{NO}}$ | $\Delta G^*_{\text{H}}$ | $\Delta G^*_{\text{H}_2\text{O}}$ | $\Delta G^*_{\text{NH}_3}$ |
| Sc                    | -0.86                    | 1.01                    | -0.84                             | -1.06                      |
| Ti                    | -2.29                    | 0.47                    | -1.64                             | -2.02                      |
| V                     | -2.35                    | -0.05                   | -1.30                             | -1.91                      |
| Cr                    | -1.71                    | 0.32                    | -0.04                             | -0.75                      |
| Mn                    | -1.44                    | 0.50                    | 0.14                              | -0.26                      |
| Fe                    | -1.39                    | 0.20                    | 0.14                              | -0.30                      |
| Co                    | -0.78                    | 0.23                    | 0.48                              | 0.03                       |
| Ni                    | -0.09                    | 0.75                    | 0.23                              | 0.41                       |

**Tab. S6** Energy( $\Delta G_1$ ) required for the first protonation step of  $\text{NO} + \text{H} + \text{e}^- \rightarrow \text{HNO}(\text{NOH})$ , those with  $\Delta G_1 < 0.5$  eV are highlighted in red.

| TMN <sub>4</sub> -HTP | $\Delta G_1$ | TMO <sub>4</sub> -HTP | $\Delta G_1$ |
|-----------------------|--------------|-----------------------|--------------|
| Sc                    | -0.24        | Sc                    | NAN          |
| Ti                    | 0.16         | Ti                    | NAN          |
| V                     | 0.53         | V                     | 0.27         |
| Cr                    | 0.86         | Cr                    | 1.86         |
| Mn                    | 0.54         | Mn                    | 0.21         |
| Fe                    | 0.30         | Fe                    | 0.32         |
| Co                    | 0.55         | Co                    | 0.43         |
| Ni                    | NAN          | Ni                    | 0.55         |
| TMP <sub>4</sub> -HTP | $\Delta G_1$ | TMS <sub>4</sub> -HTP | $\Delta G_1$ |
| Sc                    | NAN          | Sc                    | NAN          |
| Ti                    | NAN          | Ti                    | 0.43         |
| V                     | 1.00         | V                     | 0.34         |
| Cr                    | 1.01         | Cr                    | 0.63         |
| Mn                    | 1.17         | Mn                    | 0.80         |
| Fe                    | 0.92         | Fe                    | 0.40         |
| Co                    | 0.78         | Co                    | 0.42         |
| Ni                    | 0.30         | Ni                    | 0.52         |

**Tab. S7** The energy of all the possible intermediates, and the free energy of the five hydrogenation steps.

|                       |                   |             |                  |
|-----------------------|-------------------|-------------|------------------|
| ScN <sub>4</sub> -HTP | adsorbate         | Energy (eV) | Free energy (eV) |
|                       | slab              | -540.60     |                  |
| step0                 | *N_O              | -554.80     | -1.47            |
| step1                 | *HN_O             | -558.79     | -0.24            |
|                       | *N_OH             | -557.41     | 1.00             |
| step2                 | *2HN_O            | -563.43     | -0.83            |
|                       | *HN_OH            | -562.54     | 0.01             |
| step3                 | *2HN_OH           | -566.04     | 1.07             |
|                       | *O                | -546.43     | 0.57             |
| step4                 | *OH               | -552.52     | -2.43            |
| step5                 | *H <sub>2</sub> O | -556.10     | 0.15             |
| step6                 | H <sub>2</sub> O  | -540.60     | 0.74             |
| TiN <sub>4</sub> -HTP | adsorbate         | Energy (eV) | Free energy (eV) |
|                       | slab              | -542.85     |                  |
| step0                 | *N_O              | -558.02     | -2.38            |
| step1                 | *HN_O             | -561.53     | 0.16             |
|                       | *N_OH             | -561.18     | 0.55             |
| step2                 | *2HN_O            | -566.39     | -0.95            |
|                       | *HN_OH            | -565.50     | -0.18            |
| step3                 | *2HN_OH           | -568.71     | 1.27             |
|                       | *O                | -549.94     | -0.06            |
| step4                 | *OH               | -555.69     | -2.09            |
| step5                 | *H <sub>2</sub> O | -558.85     | 0.66             |
| step6                 | H <sub>2</sub> O  | -542.85     | 1.16             |
| FeN <sub>4</sub> -HTP | adsorbate         | Energy (eV) | Free energy (eV) |
|                       | slab              | -539.41     |                  |
| step0                 | *N_O              | -553.50     | -1.23            |
| step1                 | *HN_O             | -556.93     | 0.30             |
|                       | *N_OH             | -556.28     | 0.94             |
| step2                 | *2HN_O            | -560.25     | 0.39             |
|                       | *HN_OH            | -560.31     | 0.36             |
| step3                 | *2HN_OH           | -564.07     | 0.09             |
|                       | *NH               | -550.00     | -1.19            |
| step4                 | *NH <sub>2</sub>  | -555.07     | -1.06            |
| step5                 | *NH <sub>3</sub>  | -559.55     | -0.75            |
| step6                 | NH <sub>3</sub>   | -539.41     | 0.06             |
| VO <sub>4</sub> -HTP  | adsorbate         | Energy (eV) | Free energy (eV) |
|                       | slab              | -481.94     |                  |
| step0                 | *N_O              | -496.29     | -1.52            |
| step1                 | *HN_O             | -499.71     | 0.27             |

|                       |                   |             |                  |
|-----------------------|-------------------|-------------|------------------|
|                       | *N_OH             | -499.52     | 0.46             |
| step2                 | *2HN_O            | -504.72     | -1.13            |
|                       | *HN_OH            | -504.10     | -0.60            |
| step3                 | *2HN_OH           | -507.55     | 0.81             |
|                       | *O                | -489.86     | -1.60            |
| step4                 | *OH               | -493.87     | -0.27            |
| step5                 | *H <sub>2</sub> O | -497.03     | 0.52             |
| step6                 | H <sub>2</sub> O  | -481.94     | 0.23             |
| MnO <sub>4</sub> -HTP | adsorbate         | Energy (eV) | Free energy (eV) |
|                       | slab              | -479.86     |                  |
| step0                 | *N_O              | -493.48     | -0.78            |
| step1                 | *HN_O             | -496.98     | 0.21             |
|                       | *N_OH             | -496.44     | 0.75             |
| step2                 | *2HN_O            | -499.66     | 1.06             |
|                       | *HN_OH            | -500.57     | 0.15             |
| step3                 | *2HN_OH           | -504.90     | -0.58            |
|                       | *NH               | -490.26     | -0.90            |
| step4                 | *NH <sub>2</sub>  | -495.43     | -1.41            |
| step5                 | *NH <sub>3</sub>  | -500.27     | -1.08            |
| step6                 | NH <sub>3</sub>   | -479.86     | 0.31             |
| FeO <sub>4</sub> -HTP | adsorbate         | Energy (eV) | Free energy (eV) |
|                       | slab              | -474.16     |                  |
| step0                 | *N_O              | -487.99     | -0.97            |
| step1                 | *HN_O             | -491.38     | 0.32             |
|                       | *N_OH             | -490.79     | 0.90             |
| step2                 | *2HN_O            | -494.83     | 0.23             |
|                       | *HN_OH            | -494.64     | 0.45             |
| step3                 | *2HN_OH           | -499.16     | -0.80            |
|                       | *O                | -479.45     | -0.94            |
| step4                 | *OH               | -484.37     | -1.15            |
| step5                 | *H <sub>2</sub> O | -488.82     | -0.85            |
| step6                 | H <sub>2</sub> O  | -474.16     | -0.14            |
| CoO <sub>4</sub> -HTP | adsorbate         | Energy (eV) | Free energy (eV) |
|                       | slab              | -469.20     |                  |
| step0                 | *N_O              | -482.99     | -0.96            |
| step1                 | *HN_O             | -486.29     | 0.43             |
|                       | *N_OH             | -485.51     | 1.21             |
| step2                 | *2HN_O            | -489.92     | 0.12             |
|                       | *HN_OH            | -489.86     | 0.15             |
| step3                 | *2HN_OH           | -494.06     | -0.42            |
|                       | *O                | -473.97     | -0.45            |
| step4                 | *OH               | -479.13     | -1.36            |
| step5                 | *H <sub>2</sub> O | -483.67     | -0.95            |



|                       |                   |             |                  |
|-----------------------|-------------------|-------------|------------------|
| step6                 | H <sub>2</sub> O  | -469.20     | -0.34            |
| NiP <sub>4</sub> -HTP | adsorbate         | Energy (eV) | Free energy (eV) |
|                       | slab              | -487.44     |                  |
| step0                 | *N_O              | -501.16     | -0.88            |
| step1                 | *HN_O             | -503.72     | 1.14             |
|                       | *N_OH             | -504.56     | 0.28             |
| step2                 | *2HN_O            | -508.10     | 0.25             |
|                       | *HN_OH            | -508.35     | 0.04             |
| step3                 | *2HN_OH           | -512.79     | -0.91            |
|                       | *NH               | -499.73     | -2.74            |
| step4                 | *NH <sub>2</sub>  | -502.79     | 0.59             |
| step5                 | *NH <sub>3</sub>  | -507.90     | -1.35            |
| step6                 | NH <sub>3</sub>   | -487.44     | 0.35             |
| TiS <sub>4</sub> -HTP | adsorbate         | Energy (eV) | Free energy (eV) |
|                       | slab              | -446.77     |                  |
| step0                 | *N_O              | -461.79     | -2.29            |
| step1                 | *HN_O             | -465.16     | 0.43             |
|                       | *N_OH             | -464.89     | 0.73             |
| step2                 | *2HN_O            | -470.14     | -1.23            |
|                       | *HN_OH            | -469.39     | -0.45            |
| step3                 | *2HN_OH           | -473.57     | 0.35             |
|                       | *O                | -454.79     | -1.00            |
| step4                 | *OH               | -459.41     | -0.99            |
| step5                 | *H <sub>2</sub> O | -463.24     | -0.05            |
| step6                 | H <sub>2</sub> O  | -446.77     | 1.64             |
| VS <sub>4</sub> -HTP  | adsorbate         | Energy (eV) | Free energy (eV) |
|                       | slab              | -447.32     |                  |
| step0                 | *N_O              | -462.51     | -2.35            |
| step1                 | *HN_O             | -465.84     | 0.35             |
|                       | *N_OH             | -465.72     | 0.48             |
| step2                 | *2HN_O            | -470.85     | -1.13            |
|                       | *HN_OH            | -470.07     | -0.44            |
| step3                 | *2HN_OH           | -474.00     | 0.52             |
|                       | *O                | -455.77     | -1.38            |
| step4                 | *OH               | -459.67     | -0.24            |
| step5                 | *H <sub>2</sub> O | -463.48     | -0.05            |
| step6                 | H <sub>2</sub> O  | -447.32     | 1.30             |
| FeS <sub>4</sub> -HTP | adsorbate         | Energy (eV) | Free energy (eV) |
|                       | slab              | -445.06     |                  |
| step0                 | *N_O              | -459.32     | -1.39            |
| step1                 | *HN_O             | -462.54     | 0.47             |
|                       | *N_OH             | -461.93     | 1.09             |
| step2                 | *2HN_O            | -465.81     | 0.46             |

|                       |                   |             |                  |
|-----------------------|-------------------|-------------|------------------|
|                       | *HN_OH            | -465.90     | 0.39             |
| step3                 | *2HN_OH           | -470.10     | -0.51            |
|                       | *NH               | -455.61     | -0.93            |
| step4                 | *NH <sub>2</sub>  | -460.71     | -1.30            |
| step5                 | *NH <sub>3</sub>  | -465.44     | -1.03            |
| step6                 | NH <sub>3</sub>   | -445.06     | 0.30             |
| CoS <sub>4</sub> -HTP | adsorbate         | Energy (eV) | Free energy (eV) |
|                       | slab              | -441.46     |                  |
| step0                 | *N_O              | -455.03     | -0.78            |
| step1                 | *HN_O             | -458.37     | 0.42             |
|                       | *N_OH             | -457.71     | 1.08             |
| step2                 | *2HN_O            | -461.94     | 0.15             |
|                       | *HN_OH            | -461.74     | 0.37             |
| step3                 | *2HN_OH           | -466.17     | -0.43            |
|                       | *O                | -446.20     | -0.62            |
| step4                 | *OH               | -451.10     | -1.17            |
| step5                 | *H <sub>2</sub> O | -455.76     | -1.02            |
| step6                 | H <sub>2</sub> O  | -441.46     | -0.48            |

**Tab. S8** Transfer charge of TM atoms, and the N-O bond of adsorbed NO on TMX<sub>4</sub>-HTPs.

| TMN <sub>4</sub> -HTP | Translate charge (e <sup>-</sup> ) | N-O bond (Å) | TMO <sub>4</sub> -HTP | Translate charge (e <sup>-</sup> ) | N-O bond (Å) |
|-----------------------|------------------------------------|--------------|-----------------------|------------------------------------|--------------|
| Sc                    | 0.40348                            | 1.19808      | Sc                    | 0.26167                            | 1.18518      |
| Ti                    | 0.50708                            | 1.20156      | Ti                    | 0.41017                            | 1.19433      |
| V                     | 0.44967                            | 1.20008      | V                     | 0.30807                            | 1.19106      |
| Cr                    | 0.43873                            | 1.1995       | Cr                    | 0.29874                            | 1.18734      |
| Mn                    | 0.34409                            | 1.1906       | Mn                    | 0.15188                            | 1.1784       |
| Fe                    | 0.38448                            | 1.19437      | Fe                    | 0.23941                            | 1.18434      |
| Co                    | 0.18459                            | 1.18634      | Co                    | 0.17147                            | 1.18179      |
| Ni                    | NAN                                | NAN          | Ni                    | 0.08413                            | 1.17775      |
| TMP <sub>4</sub> -HTP | Translate charge (e <sup>-</sup> ) | N-O bond (Å) | TMS <sub>4</sub> -HTP | Translate charge (e <sup>-</sup> ) | N-O bond (Å) |
| Sc                    | NAN                                | NAN          | Sc                    | 0.22112                            | 1.17567      |
| Ti                    | NAN                                | NAN          | Ti                    | 0.32804                            | 1.1829       |
| V                     | 0.48947                            | 1.19306      | V                     | 0.35708                            | 1.18548      |
| Cr                    | 0.42713                            | 1.18901      | Cr                    | 0.3021                             | 1.18283      |
| Mn                    | 0.26618                            | 1.17993      | Mn                    | 0.28027                            | 1.18199      |
| Fe                    | 0.18829                            | 1.17966      | Fe                    | 0.22167                            | 1.18116      |
| Co                    | 0.36646                            | 1.18601      | Co                    | 0.1449                             | 1.17477      |
| Ni                    | 0.16625                            | 1.17638      | Ni                    | 0.04461                            | 1.17103      |

**Tab. S9** Adsorption free energies of HNO ( $\Delta^*G_{\text{HNO}}$ ), NOH ( $\Delta G_{\text{NOH}}$ ),  $\Delta G_{\text{HNO}} - \Delta G_{\text{NOH}}$ , the lowest energies are highlighted in red.

| TMN <sub>4</sub> -<br>HTP | $\Delta G_{\text{HNO}}$<br>(eV) | $\Delta G_{\text{NOH}}$<br>(eV) | $\Delta G_{\text{HNO}} - \Delta G_{\text{NOH}}$<br>(eV) | TMO <sub>4</sub> -<br>HTP | $\Delta G_{\text{HNO}}$<br>(eV) | $\Delta G_{\text{NOH}}$<br>(eV) | $\Delta G_{\text{HNO}} - \Delta G_{\text{NOH}}$<br>(eV) |
|---------------------------|---------------------------------|---------------------------------|---------------------------------------------------------|---------------------------|---------------------------------|---------------------------------|---------------------------------------------------------|
| Sc                        | -1.72                           | -0.34                           | -1.38                                                   | Sc                        | NAN                             | NAN                             | NAN                                                     |
| Ti                        | -2.22                           | -1.87                           | -0.35                                                   | Ti                        | NAN                             | NAN                             | NAN                                                     |
| V                         | -1.56                           | -1.47                           | -0.09                                                   | V                         | -1.25                           | -1.06                           | -0.19                                                   |
| Cr                        | -0.18                           | -0.82                           | 0.64                                                    | Cr                        | 0.37                            | 0.68                            | -0.31                                                   |
| Mn                        | -0.66                           | -0.09                           | -0.57                                                   | Mn                        | -0.57                           | -0.02                           | -0.54                                                   |
| Fe                        | -0.93                           | -0.28                           | -0.65                                                   | Fe                        | -0.65                           | -0.05                           | -0.59                                                   |
| Co                        | -0.18                           | 0.63                            | -0.81                                                   | Co                        | -0.52                           | 0.26                            | -0.78                                                   |
| Ni                        | NAN                             | NAN                             | NAN                                                     | Ni                        | 0.34                            | 1.12                            | -0.77                                                   |
| TMP <sub>4</sub> -<br>HTP | $\Delta G_{\text{HNO}}$<br>(eV) | $\Delta G_{\text{NOH}}$<br>(eV) | $\Delta G_{\text{HNO}} - \Delta G_{\text{NOH}}$<br>(eV) | TMS <sub>4</sub> -<br>HTP | $\Delta G_{\text{HNO}}$<br>(eV) | $\Delta G_{\text{NOH}}$<br>(eV) | $\Delta G_{\text{HNO}} - \Delta G_{\text{NOH}}$<br>(eV) |
| Sc                        | NAN                             | NAN                             | NAN                                                     | Sc                        | NAN                             | NAN                             | NAN                                                     |
| Ti                        | NAN                             | NAN                             | NAN                                                     | Ti                        | -1.86                           | -1.60                           | -0.27                                                   |
| V                         | -2.27                           | -2.58                           | 0.31                                                    | V                         | -2.01                           | -1.88                           | -0.13                                                   |
| Cr                        | -1.59                           | -1.74                           | 0.15                                                    | Cr                        | -1.08                           | -1.07                           | -0.01                                                   |
| Mn                        | -0.97                           | -0.80                           | -0.17                                                   | Mn                        | -0.64                           | -0.32                           | -0.31                                                   |
| Fe                        | -1.08                           | -0.46                           | -0.62                                                   | Fe                        | -0.99                           | -0.38                           | -0.61                                                   |
| Co                        | -1.43                           | -0.84                           | -0.60                                                   | Co                        | -0.36                           | 0.30                            | -0.66                                                   |
| Ni                        | -0.58                           | 0.26                            | -0.84                                                   | Ni                        | 0.43                            | 1.69                            | -1.26                                                   |

**Tab. S10** Charge transfer of X atoms ( $Q_X$ ) before reaction, number of valence electrons ( $N$ ), atomic radius (AR), ion radius (IR), first ionization energy (IE), electron affinity of the metal atom (EA), density of TM ( $\rho_{TM}$ ), relative atomic mass ( $M$ ), pauling electronegativity ( $\chi$ ) of each investigated  $TMX_4$ -HTPs.

| Materials | $Q_X$    | $N$ | AR  | IR   | IE  | EA   | $\rho_{TM}$ | $M$      | $\chi$ |
|-----------|----------|-----|-----|------|-----|------|-------------|----------|--------|
| ScN       | 25.33405 | 3   | 144 | 74.5 | 633 | -18  | 2.99        | 44.95591 | 1.36   |
| TiN       | 25.21795 | 4   | 136 | 86   | 659 | -8   | 4.51        | 47.867   | 1.54   |
| VN        | 25.0772  | 5   | 125 | 79   | 651 | -51  | 6.11        | 50.9415  | 1.63   |
| CrN       | 24.82608 | 6   | 127 | 80   | 653 | -64  | 7.14        | 51.9961  | 1.66   |
| MnN       | 24.69297 | 7   | 139 | 67   | 717 | 0    | 7.47        | 54.93805 | 1.55   |
| FeN       | 24.64825 | 6   | 125 | 78   | 763 | -16  | 7.87        | 55.845   | 1.83   |
| CoN       | 24.6003  | 4   | 126 | 74.5 | 760 | -64  | 8.9         | 58.9332  | 1.88   |
| NiN       | 24.59735 | 4   | 121 | 69   | 737 | -112 | 8.91        | 58.6934  | 1.91   |
| VP        | 17.53348 | 5   | 125 | 79   | 651 | -51  | 6.11        | 50.9415  | 1.63   |
| CrP       | 17.2083  | 6   | 127 | 80   | 653 | -64  | 7.14        | 51.9961  | 1.66   |
| MnP       | 16.91967 | 7   | 139 | 67   | 717 | 0    | 7.47        | 54.93805 | 1.55   |
| FeP       | 16.62054 | 6   | 125 | 78   | 763 | -16  | 7.87        | 55.845   | 1.83   |
| CoP       | 16.54063 | 4   | 126 | 74.5 | 760 | -64  | 8.9         | 58.9332  | 1.88   |
| NiP       | 16.48769 | 4   | 121 | 69   | 737 | -112 | 8.91        | 58.6934  | 1.91   |
| ScO       | 28.57744 | 3   | 144 | 74.5 | 633 | -18  | 2.99        | 44.95591 | 1.36   |
| TiO       | 28.34883 | 4   | 136 | 86   | 659 | -8   | 4.51        | 47.867   | 1.54   |
| VO        | 28.20933 | 5   | 125 | 79   | 651 | -51  | 6.11        | 50.9415  | 1.63   |
| CrO       | 28.19818 | 6   | 127 | 80   | 653 | -64  | 7.14        | 51.9961  | 1.66   |
| MnO       | 28.12737 | 7   | 139 | 67   | 717 | 0    | 7.47        | 54.93805 | 1.55   |
| FeO       | 27.93121 | 6   | 125 | 78   | 763 | -16  | 7.87        | 55.845   | 1.83   |
| CoO       | 27.83559 | 4   | 126 | 74.5 | 760 | -64  | 8.9         | 58.9332  | 1.88   |
| NiO       | 27.80528 | 4   | 121 | 69   | 737 | -112 | 8.91        | 58.6934  | 1.91   |
| ScS       | 25.53636 | 3   | 144 | 74.5 | 633 | -18  | 2.99        | 44.95591 | 1.36   |
| TiS       | 25.47583 | 4   | 136 | 86   | 659 | -8   | 4.51        | 47.867   | 1.54   |
| VS        | 25.20713 | 5   | 125 | 79   | 651 | -51  | 6.11        | 50.9415  | 1.63   |
| CrS       | 25.00778 | 6   | 127 | 80   | 653 | -64  | 7.14        | 51.9961  | 1.66   |
| MnS       | 24.90353 | 7   | 139 | 67   | 717 | 0    | 7.47        | 54.93805 | 1.55   |
| FeS       | 24.51769 | 6   | 125 | 78   | 763 | -16  | 7.87        | 55.845   | 1.83   |
| CoS       | 24.21995 | 4   | 126 | 74.5 | 760 | -64  | 8.9         | 58.9332  | 1.88   |
| NiS       | 24.1118  | 4   | 121 | 69   | 737 | -112 | 8.91        | 58.6934  | 1.91   |

## References

1. J. é. Filhol and M. Neurock, *Angewandte Chemie*, 2010, **45**, 402-406.
2. R. Ouyang, E. Ahmetcik, C. Carbogno, M. Scheffler and L. M. Ghiringhelli, *Journal of Physics: Materials*, 2019, **2**.
3. R. Ouyang, S. Curtarolo, E. Ahmetcik, M. Scheffler and L. M. Ghiringhelli, *Physical Review Materials*, 2018, **2**.
